# Supplementary material for: Tunable optical properties of isoreticular UiO-67 MOFs for photocatalysis: a theoretical study
Source: Royal Society of Chemistry journal article supplement (doi:10.1039/d4dt01017e), 2024-01-01
Supplement: d4dt01017e1.pdf [file d4dt01017e1.pdf]

# Supplementary Information

## Tunable Optical Properties of Isoreticular UiO-67 MOFs for Photocatalysis: A Theoretical Study

Manuel A. Treto-Suárez<sup>a\*</sup>, Yoan Hidalgo-Rosa<sup>b</sup>, Mario Saavedra-Torres<sup>c</sup>, Bryan D. Koivisto<sup>d</sup>, Karel Mena Ulecia<sup>e</sup>, Dayán Páez-Hernández<sup>f</sup>, Ximena Zarate<sup>g</sup>, Eduardo Schott<sup>h</sup>.

<sup>a</sup>Departamento de Física y Química, Facultad de Ingeniería, IDETECO, Universidad Autónoma de Chile, Av. Alemania 01090, 4810101-Temuco, Chile. [manuel.treto@uautonoma.cl](mailto:manuel.treto@uautonoma.cl)

<sup>b</sup>Centro de Nanotecnología Aplicada, Facultad de Ciencias, Ingeniería y Tecnología, Universidad Mayor, Camino La Pirámide 5750, Huechuraba, Santiago, Chile, 8580745.

<sup>c</sup>Millennium Nucleus in Catalytic Processes towards Sustainable Chemistry (CSC), Chile

<sup>d</sup>Department of Chemistry and Biology, Toronto Metropolitan University, Toronto, Ontario, Canada

<sup>e</sup>Departamento de Ciencias Biológicas y Químicas, Facultad de Recursos Naturales, Universidad Católica de Temuco, Ave. Rudecindo Ortega 02950, Temuco, Chile.

<sup>f</sup>Doctorado en Fisicoquímica Molecular, Center of Applied Nanosciences (CANS), Universidad Andres Bello. Ave. República #275, Santiago de Chile, Chile.

<sup>g</sup>Instituto de Ciencias Aplicadas, Facultad de Ingeniería, Universidad Autónoma de Chile, Santiago, Chile.

<sup>h</sup>Departamento de Química Inorgánica, Facultad de Química y de Farmacia, Centro de Energía UC, Centro de Investigación en Nanotecnología y Materiales Avanzados CIEN-UC, Pontificia Universidad Católica de Chile, Avenida Vicuña Mackenna, 4860, Santiago, Chile. [edschott@uc.cl](mailto:edschott@uc.cl)

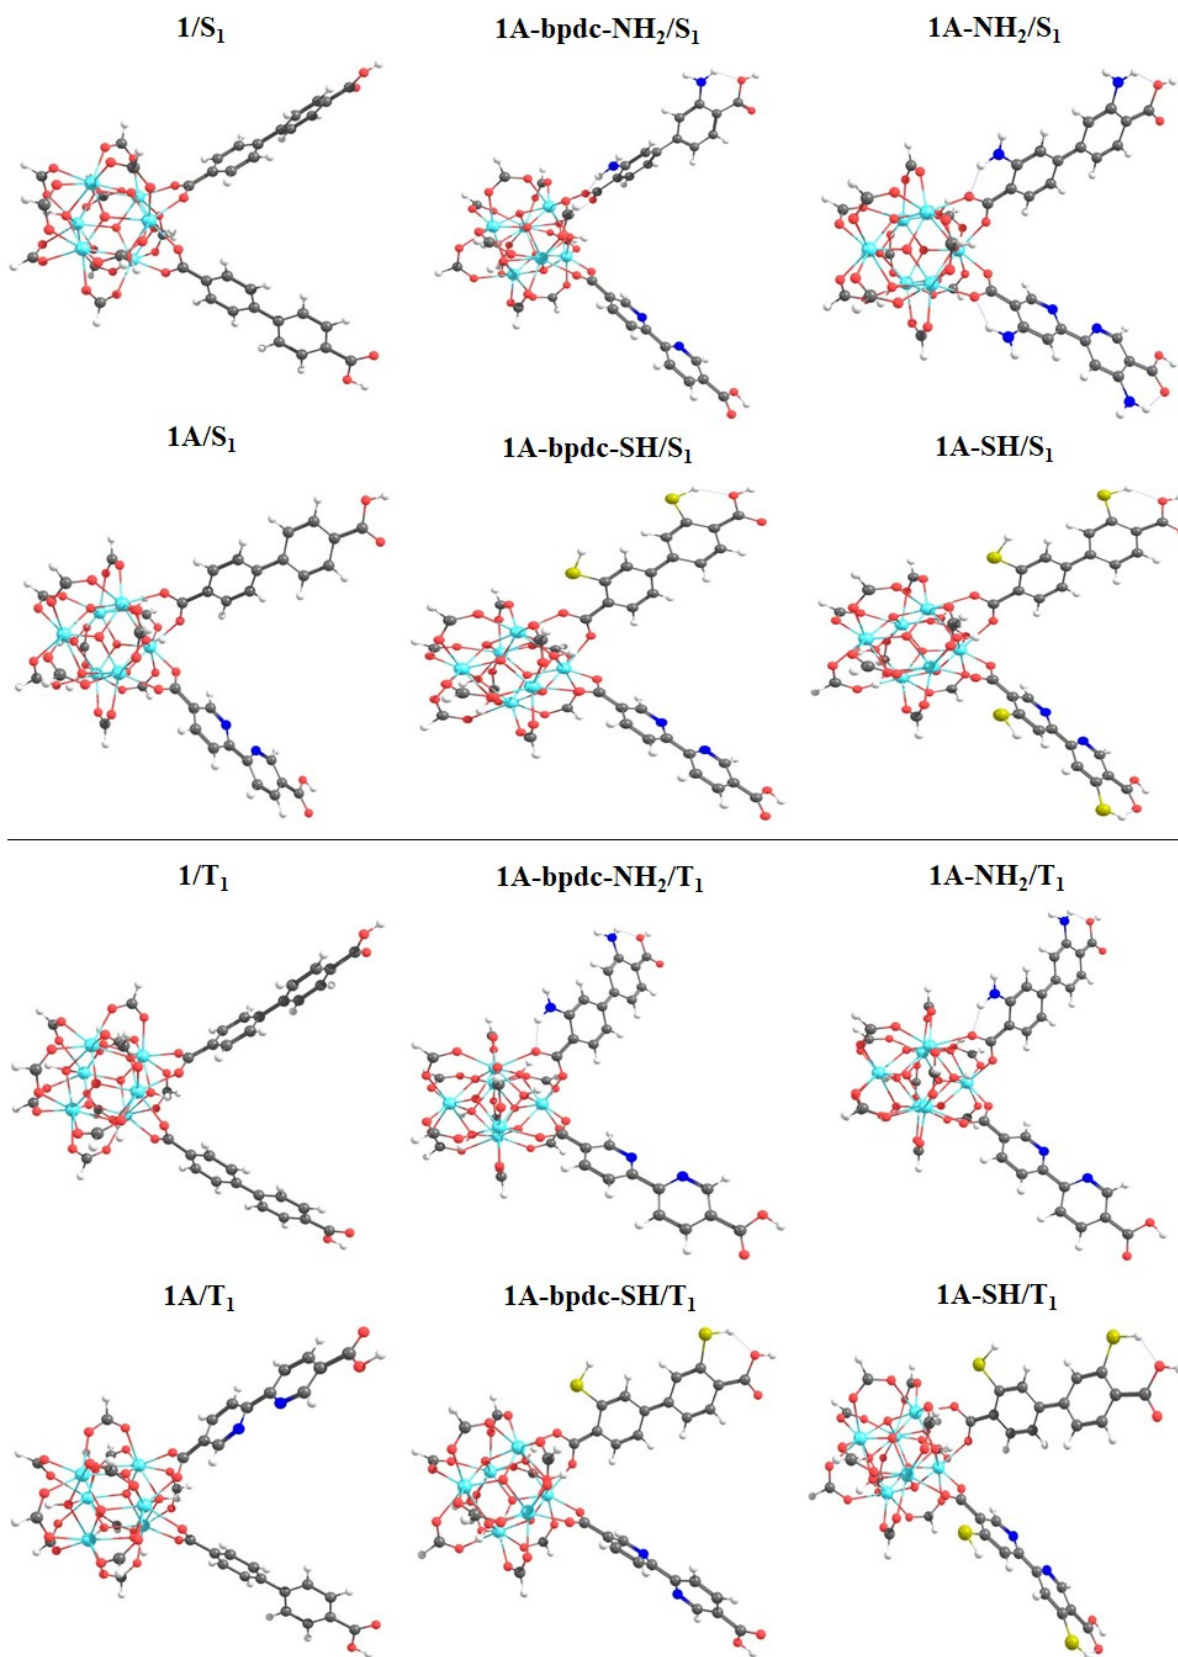

**Figure S1.** Optimized structures of the studied systems (**1**, **1A**, **1A-bpdc-NH<sub>2</sub>**, **1A-bpdc-SH**, **1A-NH<sub>2</sub>** and **1A-SH**) in the S<sub>1</sub> and T<sub>1</sub> states via DFT/B3LYP/Def2-TZPP theory level. Atoms are denoted with light green (zirconium), gray (carbon), light gray (hydrogen), red (oxygen), darker blue (nitrogen), blue (zirconium) and yellow (sulfur) spheres.

**\*Table S1.** Structure parameters to the studied models (Node/linkers) in the  $S_0$ ,  $S_1$ , and  $T_1$  states via TDDFT/B3LYP/Def2-TZPP theory level. Where  $d$  is bond lengths,  $\delta$  is the angle, and  $\gamma$  is torsion angles (in  $\text{\AA}$ ). \*Nodo-(bpdc)<sub>2</sub>/ $S_0$  (**1**), Nodo-bpdc-bpydc/ $S_0$  (**1A**). R1 and R2 is H, NH<sub>2</sub> and SH to **1A**, **1A-NH<sub>2</sub>** and **1A-SH**, respectively.

| Parameters                     | 1            | 1A           | 1A-NH <sub>2</sub> | 1A-SH        | 1            | 1A           | 1A-NH <sub>2</sub> | 1A-SH        | 1           | 1A           | 1A-NH <sub>2</sub> | 1A-SH        |
|--------------------------------|--------------|--------------|--------------------|--------------|--------------|--------------|--------------------|--------------|-------------|--------------|--------------------|--------------|
|                                | $S_0$        |              |                    |              | $S_1$        |              |                    |              | $T_1$       |              |                    |              |
| <b>Nodo</b>                    |              |              |                    |              |              |              |                    |              |             |              |                    |              |
| $d(\text{Zr1-Zr2})$            | 3.564        | 3.567        | 3.568              | 3.566        | 3.562        | 3.563        | 3.532              | 3.540        | 3.565       | 3.561        | 3.506              | 3.563        |
| $d(\text{Zr1-Zr3})$            | 3.578        | 3.572        | 3.427              | 3.422        | 3.532        | 3.429        | 3.543              | 3.429        | 3.577       | 3.429        | 3.616              | 3.559        |
| $d(\text{Zr2-Zr3})$            | 3.424        | 3.426        | 3.573              | 3.574        | 3.502        | 3.569        | 3.704              | 3.587        | 3.424       | 3.567        | 3.373              | 3.434        |
| $d(\text{Zr1-Zr4})$            | 3.653        | 3.653        | 3.644              | 3.656        | 3.703        | 3.634        | 3.585              | 3.669        | 3.568       | 3.634        | 3.583              | 3.581        |
| $d(\text{Zr2-O1})$             | 2.191        | 2.209        | 2.194              | 2.199        | 2.175        | 2.206        | 2.261              | 2.123        | 2.190       | 2.222        | 2.129              | 2.196        |
| $d(\text{Zr1-O2})$             | 2.288        | 2.301        | 2.261              | 2.274        | 2.228        | 2.302        | 2.279              | 2.106        | 2.278       | 2.303        | 2.354              | 2.316        |
| $d(\text{Zr4-O3})$             | 2.332        | 2.321        | 2.351              | 2.368        | 2.262        | 2.300        | 2.231              | 2.448        | 2.320       | 2.293        | 2.168              | 2.291        |
| $\delta(\text{Zr1-Zr2-Zr3})$   | 57.3         | 57.4         | 57.4               | 57.3         | 59.2         | 57.5         | 56.8               | 57.5         | 57.3        | 57.5         | 56.5               | 57.6         |
| $\delta(\text{Zr3-Zr1-Zr4})$   | 90.1         | 90.0         | 89.8               | 90.0         | 90.4         | 90.0         | 88.1               | 89.1         | 89.0        | 89.9         | 89.6               | 89.9         |
| $\delta(\text{Zr1-O4-Zr2})$    | 117.3        | 117.4        | 117.5              | 117.5        | 118.3        | 116.8        | 116.2              | 116.6        | 117.3       | 116.9        | 116.9              | 116.7        |
| $\delta(\text{Zr1-O4-Zr3})$    | 109.2        | 109.1        | 109.1              | 109.0        | 110.2        | 109.2        | 110.6              | 110.1        | 107.1       | 109.2        | 109.6              | 108.7        |
| $\gamma(\text{Zr1-O1-O2-Zr2})$ | 4.7          | 4.5          | 3.9                | 3.7          | 4.4          | 2.1          | 1.8                | 1.2          | 4.8         | 0.9          | -11.0              | 1.5          |
| $\gamma(\text{Zr4-O3-O5-Zr5})$ | 0.3          | 1.1          | -0.4               | 0.1          | -0.6         | -0.4         | -0.5               | -1.2         | 0.2         | -0.5         | -0.8               | 1.9          |
| <b>bpdc</b>                    |              |              |                    |              |              |              |                    |              |             |              |                    |              |
| $d(\text{C-R1})$               | 1.081        | 1.081        | 1.369              | 1.771        | 1.090        | 1.088        | 1.241              | 1.760        | 1.081       | 1.087        | 1.371              | 1.770        |
| $d(\text{C-R2})$               | 1.080        | 1.080        | 1.364              | 1.771        | 1.089        | 1.088        | 1.362              | 1.739        | 1.081       | 1.088        | 1.368              | 1.771        |
| $\gamma(\text{OH-C1-C2-C3})$   | 0.3          | -1.7         | 3.7                | 13.9         | 0.1          | -0.2         | 1.8                | 2.1          | 0.7         | -0.2         | -2.6               | 5.4          |
| $\gamma(\text{C4-C5-C6-C7})$   | <b>-38.7</b> | <b>-38.2</b> | <b>-37.3</b>       | <b>-39.5</b> | <b>-16.3</b> | <b>-35.4</b> | <b>-40.1</b>       | <b>-38.2</b> | <b>-0.6</b> | <b>-35.5</b> | <b>-38.5</b>       | <b>-36.6</b> |
| $\gamma(\text{C8-C9-C10-O})$   | 179.6        | -            | -177.7             | 169.3        | -            | 179.6        | -179.7             | 177.5        | -           | 179.6        | -175.8             | 176.4        |
| $\gamma(\text{C1-C2-C-R1})$    | 3.5          | -0.1         | 3.7                | 2.6          | 0.6          | 0.7          | -1.5               | 0.9          | -0.3        | 0.7          | -3.5               | 2.4          |
| $\gamma(\text{C10-C9-C-R2})$   | 0.4          | 4.8          | -7.0               | -4.2         | 1.1          | 0.2          | 2.1                | 0.8          | 3.5         | 0.2          | 3.5                | -9.2         |
| <b>bpydc</b>                   |              |              |                    |              |              |              |                    |              |             |              |                    |              |
| $d(\text{N-N})$                | -            | 2.833        | 2.855              | 2.847        | -            | 2.452        | 1.373              | 2.737        | -           | 2.452        | 2.691              | 2.694        |
| $d(\text{C-R1})$               | -            | 1.081        | 1.362              | 1.770        | -            | 1.088        | 1.362              | 1.759        | -           | 1.088        | 1.351              | 1.757        |
| $d(\text{C-R2})$               | -            | 1.080        | 1.373              | 1.758        | -            | 1.089        | 1.739              | 1.770        | -           | 1.088        | 1.354              | 1.767        |
| $\gamma(\text{OH-C1-C2-C3})$   | -            | -1.4         | -1.4               | -2.2         | -            | -0.1         | 0.7                | 0.2          | -           | -0.1         | -0.8               | -0.8         |
| $\gamma(\text{N1-C4-C5-N2})$   | -            | <b>-37.7</b> | <b>-39.8</b>       | <b>-38.7</b> | -            | <b>-0.1</b>  | <b>14.5</b>        | <b>5.9</b>   | -           | <b>-0.1</b>  | <b>-0.1</b>        | <b>0.6</b>   |
| $\gamma(\text{C6-C7-C8-O1})$   | -            | 175.6        | 171.7              | 173.6        | -            | 179.2        | 178.9              | 179.6        | -           | 179.2        | 177.7              | -178.9       |
| $\gamma(\text{C1-C2-C-R1})$    | -            | 1.2          | 2.6                | 1.4          | -            | 0.0          | 2.7                | -0.4         | -           | 0.0          | 1.3                | 0.1          |
| $\gamma(\text{C10-C9-C-R2})$   | -            | -0.5         | -6.6               | -0.4         | -            | -0.6         | -6.6               | -1.6         | -           | -0.1         | -2.9               | 0.0          |

**Table S2.** Most intense singlet→singlet absorption transitions and  $S_1 \rightarrow S_0$  deactivation data to the studied systems via TDDFT/B3LYP/ Def2-TZPP theory level. Where  $\lambda_a$  and  $\lambda_e$  is the theoretical absorption and emission wavelength in nm, respectively (& experimental values);  $f$  is the oscillator strength, H (HOMO), and L (LUMO); A is assignment transitions;  $k_{rad}$  and  $\tau_{rad}$  are the radiative transition rate (in  $s^{-1}$ ) and lifetime (in seconds).

| Systems                         | Absorption ( $S_0$ ) |       |            |                                                 | Deactivation ( $S_1$ ) |                     |                     |                      |                                                 |
|---------------------------------|----------------------|-------|------------|-------------------------------------------------|------------------------|---------------------|---------------------|----------------------|-------------------------------------------------|
|                                 | $\lambda_a$          | $f$   | Active MOs | A ( $S_0 \rightarrow S_n$ )                     | $\lambda_e$            | $f$                 | $k_{rad}$           | $\tau_{rad}$         | A ( $S_1 \rightarrow S_0$ )                     |
| <b>1</b>                        | 295 (365)&           | 0.394 | H→L        | $\pi \rightarrow \pi^*$ (bpdc)                  | 339                    |                     |                     |                      |                                                 |
|                                 | 292                  | 0.302 | H-1→L      | $\pi \rightarrow \pi^*$ (bpdc)                  | 398&                   | 1.278               | $1.8 \cdot 10^9$    | $5.3 \cdot 10^{-10}$ | $\pi^* \rightarrow \pi$ (bpdc)                  |
|                                 | 283                  | 1.563 | H→L+1      | $\pi \rightarrow \pi^*$ (bpdc)                  |                        |                     |                     |                      |                                                 |
| <b>1A</b>                       | 290                  | 0.923 | H→L+1      | $\pi \rightarrow \pi^*$ (bpdc)                  | 605                    |                     |                     |                      |                                                 |
|                                 | 282                  | 0.783 | H-1→L      | $\pi \rightarrow \pi^*$ (bpydc)                 | 467&                   | $0.4 \cdot 10^{-5}$ | $0.2 \cdot 10^6$    | $4.3 \cdot 10^{-6}$  | $\pi^* \rightarrow n$ (bpydc)                   |
|                                 | 280                  | 0.695 | H-3→L      | $n \rightarrow \pi^*$ (bpydc)                   | 318<br>398&            | 1.171               | $0.2 \cdot 10^{10}$ | $5.1 \cdot 10^{-10}$ | $\pi^* \rightarrow \pi$ (bpdc)                  |
| <b>1A-(bpdc-NH<sub>2</sub>)</b> | 357                  | 0.208 | H→L+1      | $n \rightarrow \pi^*$ (bpdc-NH <sub>2</sub> )   | 404                    | 0.039               | $1.0 \cdot 10^5$    | $9.8 \cdot 10^{-6}$  | $\pi^* \rightarrow n$ (bpydc)                   |
|                                 | 281                  | 0.569 | H-3→L      | $\pi \rightarrow \pi^*$ (bpydc)                 |                        |                     |                     |                      |                                                 |
|                                 | 276                  | 0.467 | H-6→L      | $n \rightarrow \pi^*$ (bpydc)                   | 386                    | 0.707               | $0.1 \cdot 10^{10}$ | $9.0 \cdot 10^{-10}$ | $\pi^* \rightarrow \pi$ (bpdc-NH <sub>2</sub> ) |
| <b>1A-(bpdc-SH)</b>             | 358                  | 0.044 | H→L+1      | $n \rightarrow \pi^*$ (bpdc-SH)                 | 439                    | $0.5 \cdot 10^{-4}$ | $4.1 \cdot 10^4$    | $2.4 \cdot 10^{-5}$  | $\pi^* \rightarrow n$ (bpydc)                   |
|                                 | 287                  | 0.334 | H-1→L+1    | $n \rightarrow \pi^*$ (bpdc-SH)                 |                        |                     |                     |                      |                                                 |
|                                 | 283                  | 0.371 | H-2→L+1    | $\pi \rightarrow \pi^*$ (bpdc-SH)               | 378                    | 0.059               | $7.0 \cdot 10^7$    | $1.4 \cdot 10^{-8}$  | $\pi^* \rightarrow \pi$ (bpdc-SH)               |
|                                 | 281                  | 0.355 | H-3→L      | $\pi \rightarrow \pi^*$ (bpydc)                 |                        |                     |                     |                      |                                                 |
| <b>1A-(NH<sub>2</sub>)</b>      | 362                  | 0.135 | H→L        | $n \rightarrow \pi^*$ (bpdc-NH <sub>2</sub> )   | 414                    | 0.002               | $2.6 \cdot 10^6$    | $3.8 \cdot 10^{-8}$  | $\pi^* \rightarrow n$ (bpydc)                   |
|                                 | 290                  | 0.186 | H-4→L      | $\pi \rightarrow \pi^*$ (bpdc-NH <sub>2</sub> ) |                        |                     |                     |                      |                                                 |
|                                 | 275                  | 0.531 | H-2→L+6    | $n \rightarrow \pi^*$ (bpydc-NH <sub>2</sub> )  | 392                    | 0.024               | $2.6 \cdot 10^7$    | $3.9 \cdot 10^{-8}$  | $\pi^* \rightarrow \pi$ (bpdc-NH <sub>2</sub> ) |
| <b>1A-(SH)</b>                  | 378                  | 0.061 | H→L+3      | $n \rightarrow \pi^*$ (bpdc-SH)                 | 404                    | 0.040               | $0.1 \cdot 10^9$    | $8.4 \cdot 10^{-9}$  | $\pi^* \rightarrow n$ (bpydc-SH)                |
|                                 | 348                  | 0.140 | H-9→L      | $\pi \rightarrow \pi^*$ (bpydc-SH)              |                        |                     |                     |                      |                                                 |
|                                 | 283                  | 0.350 | H→L+10     | $n \rightarrow \pi^*$ (bpdc-SH→O)               | 396                    | 0.070               | $7.5 \cdot 10^7$    | $1.3 \cdot 10^{-8}$  | $\pi^* \rightarrow \pi$ (bpdc-SH)               |

**Table S3.** Most intense singlet→singlet absorption transitions and  $S_1 \rightarrow S_0$  deactivation data to the studied systems via TDDFT/CAM-B3LYP/ Def2-TZPP theory level.

| Systems                         | Absorption ( $S_0$ ) |       |            |                                 | Deactivation ( $S_1$ ) |       |                         |                             |                                                 |
|---------------------------------|----------------------|-------|------------|---------------------------------|------------------------|-------|-------------------------|-----------------------------|-------------------------------------------------|
|                                 | $\lambda_a$          | $f$   | Active MOs | A                               | $\lambda_e$            | $f$   | $k_{rad} \cdot 10^{10}$ | $\tau_{rad} \cdot 10^{-10}$ | A                                               |
| <b>1</b>                        | 264                  | 0.881 | H→L        | $\pi \rightarrow \pi^*$         |                        |       |                         |                             |                                                 |
|                                 | 259                  | 2.016 | H→L+1      | $\pi \rightarrow \pi^*$         | 313                    | 1.660 | $0.3 \cdot 10^{10}$     | $3.5 \cdot 10^{-10}$        | $\pi^* \rightarrow \pi$ (bpdc)                  |
|                                 | 208                  | 0.010 | H-3→L      | $\pi \rightarrow \pi^*$         |                        |       |                         |                             |                                                 |
| <b>1A</b>                       | 264                  | 0.893 | H→L+1      | $\pi \rightarrow \pi^*$ (bpdc)  | 480                    | 0.010 | $0.3 \cdot 10^5$        | $3.1 \cdot 10^{-5}$         | $\pi^* \rightarrow n$ (bpydc)                   |
|                                 | 257                  | 1.747 | H-1→L      | $\pi \rightarrow \pi^*$ (bpydc) |                        |       |                         |                             |                                                 |
|                                 | 229                  | 0.259 | H-3→L      | $n \rightarrow \pi^*$ (bpydc)   | 297                    | 1.550 | $0.3 \cdot 10^{10}$     | $3.4 \cdot 10^{-10}$        | $\pi^* \rightarrow \pi$ (bpdc)                  |
| <b>1A-(bpdc-NH<sub>2</sub>)</b> | 299                  | 0.133 | H→L+1      | $n \rightarrow \pi^*$ (bpdc)    | 413                    | 0.003 | $1.6 \cdot 10^5$        | $5.1 \cdot 10^{-6}$         | $\pi^* \rightarrow n$ (bpydc)                   |
|                                 | 259                  | 0.421 | H-2→L+1    | $\pi \rightarrow \pi^*$ (bpydc) |                        |       |                         |                             |                                                 |
|                                 | 255                  | 1.533 | H-3→L      | $n \rightarrow \pi^*$ (bpydc)   | 240                    | 0.004 | $0.57 \cdot 10^{10}$    | $1.7 \cdot 10^{-10}$        | $\pi^* \rightarrow \pi$ (bpdc-NH <sub>2</sub> ) |
| <b>1A-(bpdc-SH)</b>             | 297                  | 0.139 | H→L+5      | $\pi \rightarrow \pi^*$ (bpdc)  | 362                    | 0.004 | $4.9 \cdot 10^6$        | $2.5 \cdot 10^{-7}$         | $\pi^* \rightarrow n$ (bpydc)                   |
|                                 | 260                  | 0.504 | H-2→L+1    | $\pi \rightarrow \pi^*$ (bpydc) |                        |       |                         |                             |                                                 |
|                                 | 256                  | 1.668 | H-2→L+5    | $n \rightarrow \pi^*$ (bpdc)    | 308                    | 1.392 | $0.25 \cdot 10^{10}$    | 4.0                         | $\pi^* \rightarrow \pi$ (bpdc-SH)               |
| <b>1A-(NH<sub>2</sub>)</b>      | 324                  | 0.259 | H→L+5      | $\pi \rightarrow \pi^*$ (bpdc)  |                        |       |                         |                             |                                                 |
|                                 | 293                  | 1.589 | H-7→L      | $\pi \rightarrow \pi^*$ (bpydc) | 319                    | 0.054 | $8.8 \cdot 10^6$        | $1.2 \cdot 10^{-7}$         | $\pi^* \rightarrow n$ (bpydc)                   |
|                                 | 251                  | 0.362 | H-9→L      | $\pi \rightarrow \pi^*$ (bpdc)  |                        |       |                         |                             |                                                 |
|                                 | 244                  | 0.243 | H-2→L+6    | $n \rightarrow \pi^*$ (bpydc)   | 324                    | 0.260 | $3.9 \cdot 10^7$        | $2.5 \cdot 10^{-8}$         | $\pi^* \rightarrow \pi$ (bpdc-NH <sub>2</sub> ) |
| <b>1A-(SH)</b>                  | 317                  | 0.163 | H-4→L      | $n \rightarrow \pi^*$ (bpdc)    | 330                    | 0.104 | $0.2 \cdot 10^9$        | $6.2 \cdot 10^{-9}$         | $\pi^* \rightarrow n$ (bpydc-SH)                |
|                                 | 306                  | 0.262 | H→L+2      | $n \rightarrow \pi^*$ (bpdc)    |                        |       |                         |                             |                                                 |
|                                 | 299                  | 1.352 | H-5→L      | $n \rightarrow \pi^*$ (bpydc)   | 306                    | 0.206 | $0.5 \cdot 10^9$        | $2.1 \cdot 10^{-9}$         | $\pi^* \rightarrow \pi$ (bpdc-SH)               |

\*Where  $\lambda_a$  is the theoretical absorption wavelength in nm (& experimental emission wavelength),  $f$  is the oscillator strength, H (HOMO), and L (LUMO). Methanol Solutions,  $\epsilon=32.63$  and refraction=1.329. &Experimental absorption wavelength.

**\*Table S4.**  $T_1 \rightarrow S_0$  deactivation data to the systems via TDDFT/CAM-B3LYP and B3LYP/ Def2-TZPP theory level.

| B3LYP                           | $\lambda_e$ | $f$                  | Assignment                      |
|---------------------------------|-------------|----------------------|---------------------------------|
| <b>1</b>                        | 346         | 1.089                | $\pi^* \rightarrow \pi$ (bpdc)  |
| <b>1A</b>                       | 572         | $2.1 \times 10^{-6}$ | $\pi^* \rightarrow \pi$ (bpydc) |
|                                 | 317         | 0.926                | $\pi^* \rightarrow \pi$ (bpdc)  |
| <b>1A-(bpdc-NH<sub>2</sub>)</b> | 419         | 0.290                | $\pi^* \rightarrow \pi$ (bpdc)  |
|                                 | 336         | 0.0001               | $\pi^* \rightarrow \pi$ (bpydc) |
| <b>1A-(bpdc-SH)</b>             | 411         | 0.114                | $\pi^* \rightarrow \pi$ (bpdc)  |
|                                 | 332         | 0.081                | $\pi^* \rightarrow \pi$ (bpydc) |
| <b>1A-(NH<sub>2</sub>)</b>      | 419         | 0.258                | $\pi^* \rightarrow \pi$ (bpdc)  |
|                                 | 327         | 0.063                | $\pi^* \rightarrow \pi$ (bpydc) |
| <b>1A-(SH)</b>                  | 388         | 0.018                | $\pi^* \rightarrow \pi$ (bpdc)  |
|                                 | 303         | 0.007                | $\pi^* \rightarrow \pi$ (bpydc) |
| <b>CAM-B3LYP</b>                |             |                      |                                 |
| <b>1</b>                        | 329         | 1.631                | $\pi^* \rightarrow \pi$ (bpdc)  |
| <b>1A</b>                       | 461         | $1.2 \times 10^{-6}$ | $\pi^* \rightarrow \pi$ (bpydc) |
|                                 | 298         | 1.548                | $\pi^* \rightarrow \pi$ (bpdc)  |
| <b>1A-(bpdc-NH<sub>2</sub>)</b> | 365         | 0.452                | $\pi^* \rightarrow \pi$ (bpdc)  |
|                                 | 290         | 0.001                | $\pi^* \rightarrow \pi$ (bpydc) |
| <b>1A-(bpdc-SH)</b>             | 347         | 0.364                | $\pi^* \rightarrow \pi$ (bpdc)  |
|                                 | 307         | 1.094                | $\pi^* \rightarrow \pi$ (bpydc) |
| <b>1A-(NH<sub>2</sub>)</b>      | 434         | 0.001                | $\pi^* \rightarrow \pi$ (bpdc)  |
|                                 | 288         | 0.002                | $\pi^* \rightarrow \pi$ (bpydc) |
| <b>1A-(SH)</b>                  | 321         | 0.593                | $\pi^* \rightarrow \pi$ (bpdc)  |
|                                 | 308         | 0.599                | $\pi^* \rightarrow \pi$ (bpydc) |

\*Where  $\lambda_e$  is the theoretical emission wavelength in nm (& experimental emission wavelength),  $f$  is the oscillator strength,  $k_{\text{rad}}$  and  $\tau_{\text{rad}}$  are the radiative transition rate (in  $\text{s}^{-1}$ ) and lifetime (in seconds).

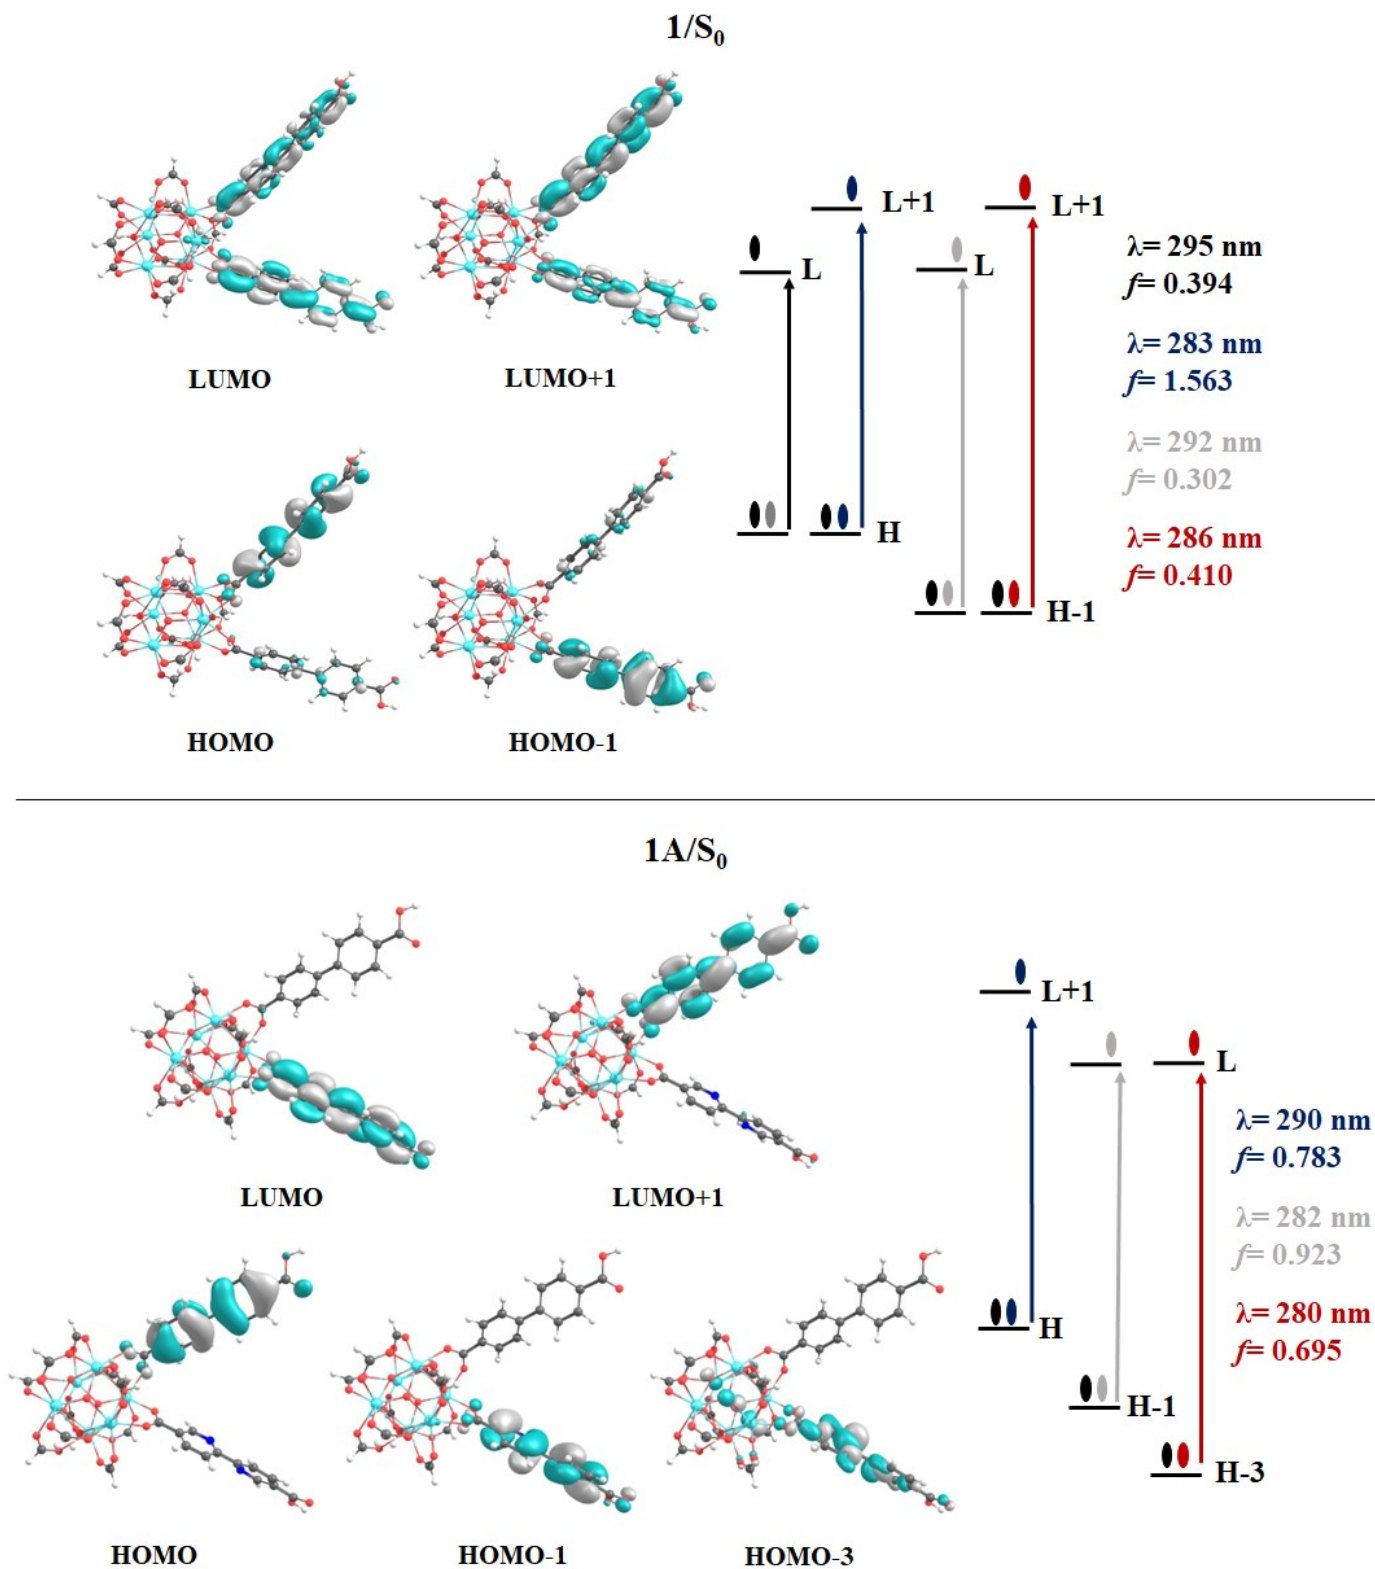

**Figure S2.** Frontier Molecular Orbitals (FMOs) are involved in the most intense singlet→singlet absorption transitions to the studied systems **1** and **1A** via TDDFT/B3LYP/Def2-TZPP theory level. Atoms are denoted with gray (carbon), light gray (hydrogen), red (oxygen), darker blue (nitrogen), and blue (zirconium) spheres. Isosurface contour values are set as 0.03.

**\*Table S5.** Structure parameters to the **bpdc**, **bpydc**, and proposed substituents (with -NH<sub>2</sub> and -SH) in the S<sub>0</sub>, S<sub>1</sub>, and T<sub>1</sub> states via TDDFT/B3LYP/Def2-TZPP theory level. Where *d* is bond lengths and  $\gamma$  is torsion angles (in Å).

| Parameters              | bpdc/S <sub>0</sub> | bpdc-NH <sub>2</sub> /S <sub>0</sub> | bpdc-SH/S <sub>0</sub> | bpydc/S <sub>0</sub> | bpydc-NH <sub>2</sub> /S <sub>0</sub> | bpydc-SH/S <sub>0</sub> |
|-------------------------|---------------------|--------------------------------------|------------------------|----------------------|---------------------------------------|-------------------------|
| <i>d</i> (N-N)          | -                   | -                                    | -                      | 2.676                | 2.846                                 | 2.814                   |
| <i>d</i> (C-R1)         | 1.081               | 1.361                                | 1.769                  | 1.081                | 1.350                                 | 1.760                   |
| <i>d</i> (C-R2)         | 1.081               | 1.369                                | 1.770                  | 1.081                | 1.356                                 | 1.761                   |
| $\gamma$ (HO-C1-C2-C3)  | 3.9                 | -1.9                                 | 0.9                    | 3.9                  | -2.0                                  | 0.6                     |
| $\gamma$ (C4-C5-C6-C7)  | -1.7                | <b>-40.0</b>                         | <b>-38.8</b>           | -                    | -                                     | -                       |
| $\gamma$ (N2-C4-C7-N2)  | -                   | -                                    | -                      | <b>-1.7</b>          | <b>-44.2</b>                          | <b>-38.6</b>            |
| $\gamma$ (C8-C9-C10-OH) | 177.2               | -176.4                               | -172.3                 | -177.2               | -178.3                                | -170.6                  |
| $\gamma$ (C1-C2-C-R1)   | 2.6                 | -2.4                                 | 0.4                    | 0.0                  | -0.6                                  | 0.3                     |
| $\gamma$ (C10-C9-C-R2)  | -3.0                | 3.8                                  | 2.1                    | -0.1                 | 2.2                                   | 1.3                     |
|                         | bpdc/S <sub>1</sub> | bpdc-NH <sub>2</sub> /S <sub>1</sub> | bpdc-SH/S <sub>1</sub> | bpydc/S <sub>1</sub> | bpydc-NH <sub>2</sub> /S <sub>1</sub> | bpydc-SH/S <sub>1</sub> |
| <i>d</i> (N-N)          | -                   | -                                    | -                      | 2.408                | 2.374                                 | 2.403                   |
| <i>d</i> (C-R1)         | 1.081               | 1.351                                | 1.757                  | 1.081                | 1.350                                 | 1.761                   |
| <i>d</i> (C-R2)         | 1.081               | 1.376                                | 1.775                  | 1.081                | 1.355                                 | 1.762                   |
| $\gamma$ (HO-C1-C2-C3)  | 0.2                 | -0.3                                 | 0.5                    | -0.1                 | 0.4                                   | 0.3                     |
| $\gamma$ (C4-C5-C6-C7)  | -1.1                | -9.6                                 | -8.0                   | -                    | -                                     | -                       |
| $\gamma$ (N2-C4-C7-N2)  | -                   | -                                    | -                      | -1.7                 | 0.2                                   | 0.1                     |
| $\gamma$ (C6-C7-C8-OH)  | 179.8               | 177.3                                | 180.0                  | 179.8                | -179.4                                | 179.8                   |
| $\gamma$ (C1-C2-C3-R1)  | -0.4                | 0.1                                  | 1.2                    | 2.6                  | 0.1                                   | 0.1                     |
| $\gamma$ (R2-C9-C7-C8)  | -0.8                | 4.3                                  | 0.7                    | -3.6                 | 0.7                                   | 0.0                     |
|                         | bpdc/T <sub>1</sub> | bpdc-NH <sub>2</sub> /T <sub>1</sub> | bpdc-SH/T <sub>1</sub> | bpydc/T <sub>1</sub> | bpydc-NH <sub>2</sub> /T <sub>1</sub> | bpydc-SH/T <sub>1</sub> |
| <i>d</i> (N-N)          | -                   | -                                    | -                      | 2.367                | 2.344                                 | 2.362                   |
| <i>d</i> (C-R1)         | 1.081               | 1.348                                | 1.764                  | 1.081                | 1.352                                 | 1.762                   |
| <i>d</i> (C-R2)         | 1.080               | 1.365                                | 1.760                  | 1.080                | 1.358                                 | 1.764                   |
| $\gamma$ (HO-C1-C2-C3)  | 1.0                 | -1.0                                 | -1.3                   | 0.0                  | 0.7                                   | 0.6                     |
| $\gamma$ (C4-C5-C6-C7)  | -0.2                | -4.6                                 | -4.3                   | -                    | -                                     | -                       |
| $\gamma$ (N2-C4-C7-N2)  | -                   | -                                    | -                      | 0.3                  | 0.4                                   | 0.1                     |
| $\gamma$ (C6-C7-C8-OH)  | -179.5              | -179.2                               | -174.1                 | -178.5               | -178.9                                | 177.5                   |
| $\gamma$ (C1-C2-C3-R1)  | -0.2                | 0.7                                  | 0.5                    | -0.2                 | 0.5                                   | 0.2                     |
| $\gamma$ (R2-C9-C7-C8)  | -0.4                | 3.2                                  | 9.3                    | -0.3                 | 0.8                                   | -0.7                    |



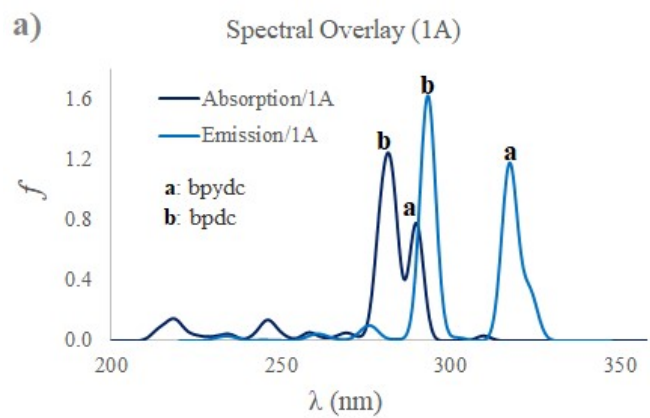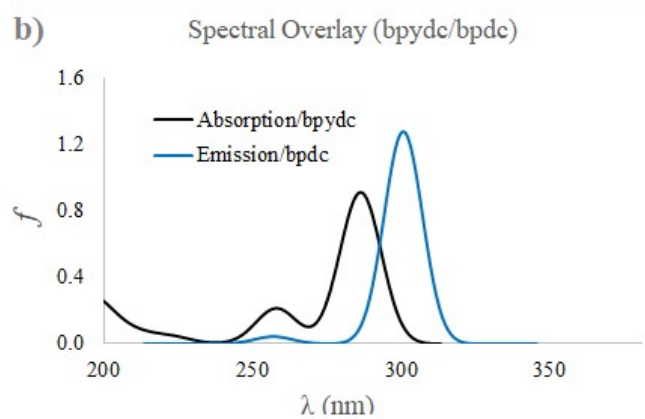

**Figure S3.** Computed spectral overlap to **a) 1A** and **b) free ligands**.

### 1A-bpdc-NH<sub>2</sub>/S<sub>0</sub>

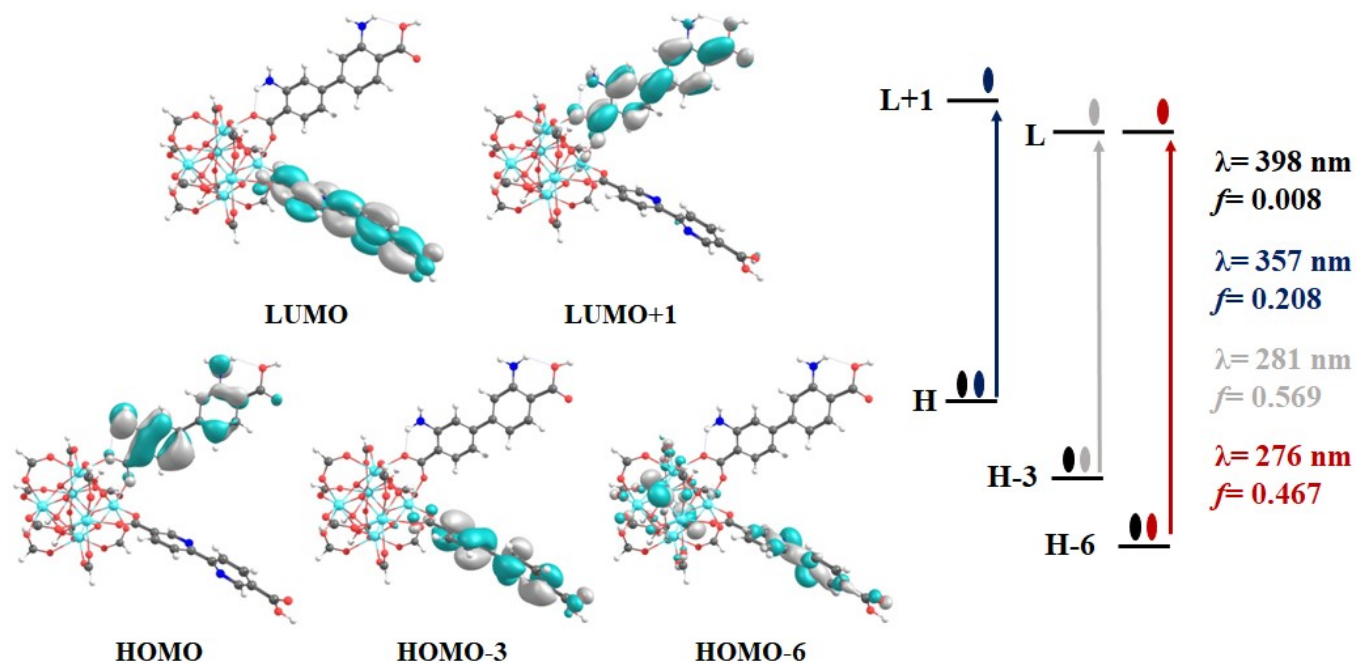

### 1A-bpdc-SH/S<sub>0</sub>

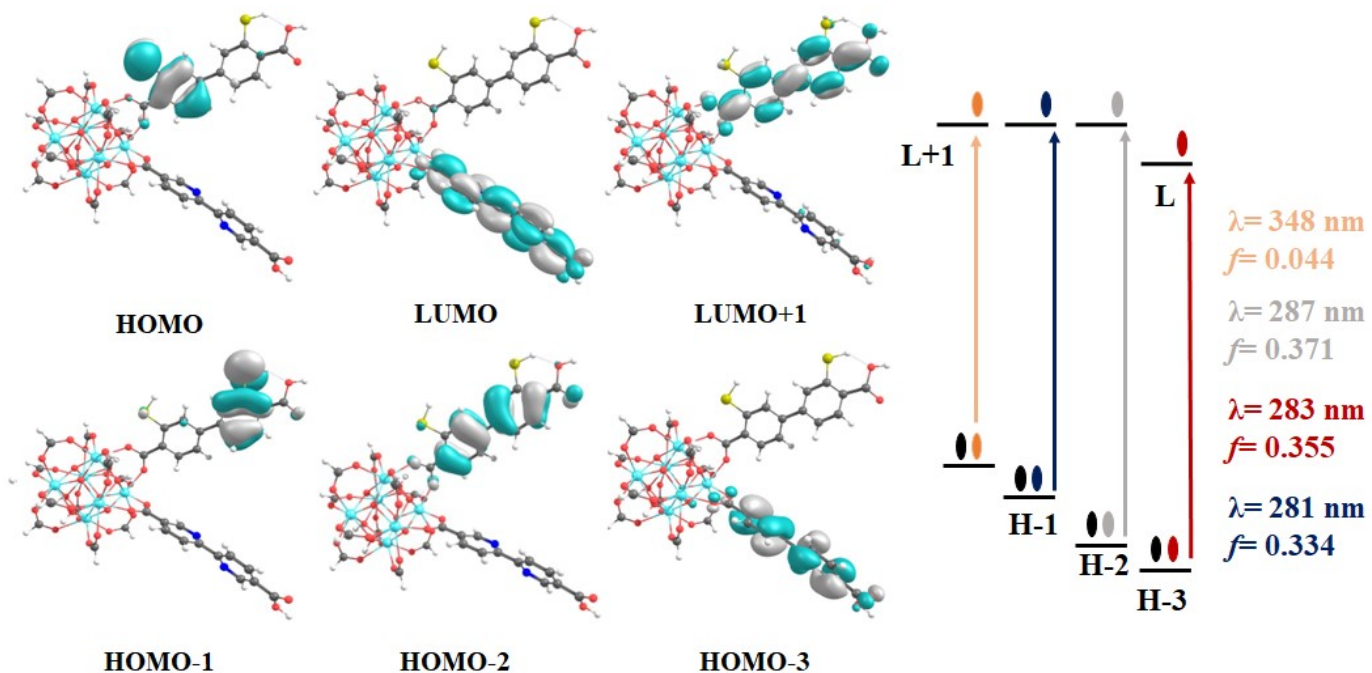

**Figure S4.** Schematic representation of the Frontier Molecular Orbitals (FMOs) involved in the most intense singlet→singlet absorption transitions to the proposed systems **1A-bpdc-NH<sub>2</sub>** and **1A-bpdc-SH** via TDDFT/B3LYP/Def2-TZPP theory level. Atoms are denoted with gray (carbon), light gray (hydrogen), red (oxygen), darker blue (nitrogen), and blue (zirconium), and yellow (sulfur) spheres. Isosurface contour values are set as 0.03.

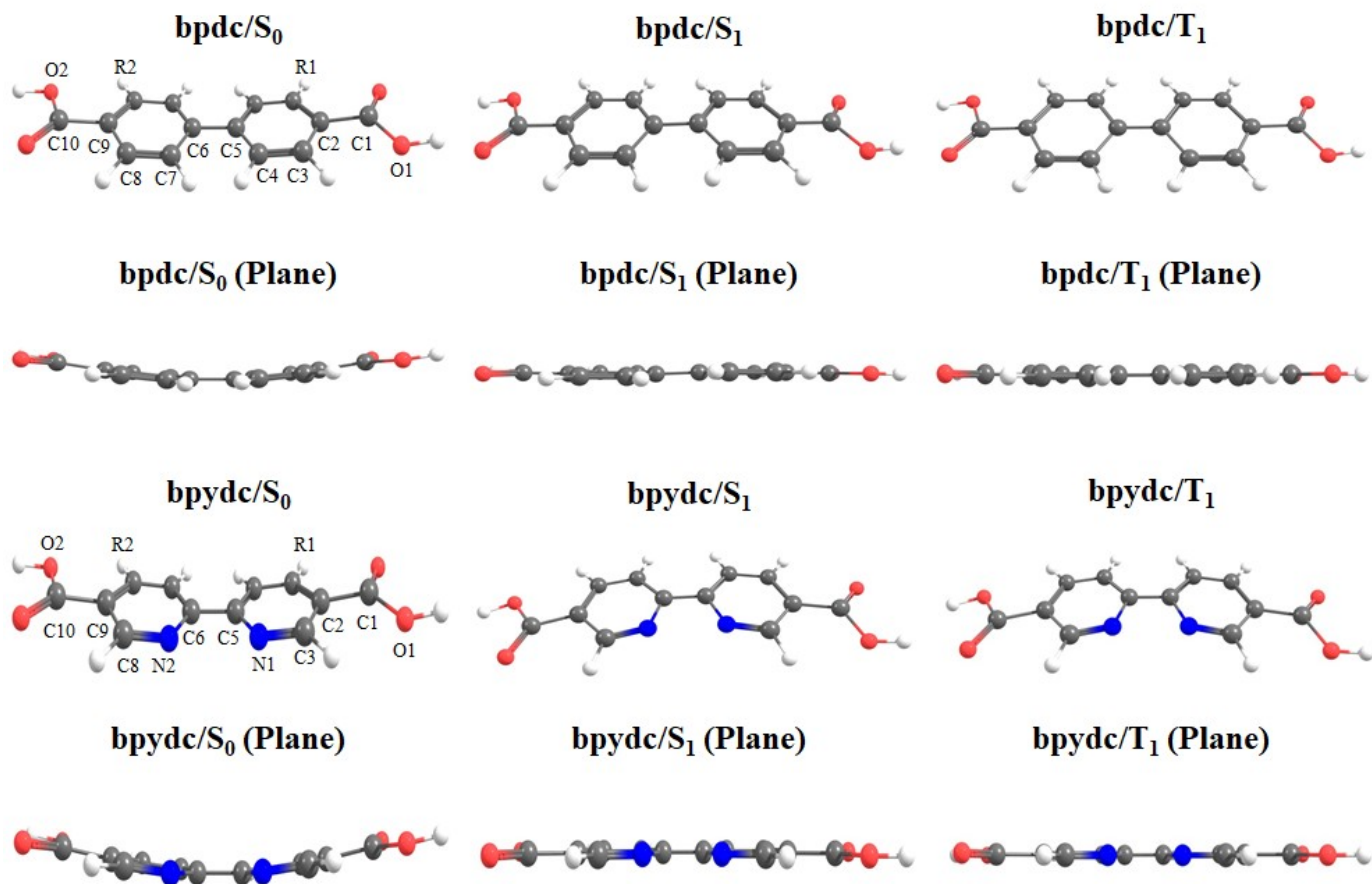

**Figure S5.** Optimized structures of the free linkers bpdc and bpydc in two perspectives to the S<sub>1</sub> and T<sub>1</sub> states via DFT/B3LYP/Def2-TZPP theory level. Atoms are denoted with gray (carbon), light gray (hydrogen), red (oxygen), blue (nitrogen), and yellow (sulfur) spheres.

**\*Table S6.** Structure parameters to the **bpdc**, **bpydc**, and proposed ligands (with -NH<sub>2</sub> and -SH) in the S<sub>0</sub>, S<sub>1</sub>, and T<sub>1</sub> states via TDDFT/B3LYP/Def2-TZPP theory level. Where *d* is bond lengths and  $\gamma$  is torsion angles (in Å).

| Parameters              | bpdc/S <sub>0</sub> | bpdc-NH <sub>2</sub> /S <sub>0</sub> | bpdc-SH/S <sub>0</sub> | bpydc/S <sub>0</sub> | bpydc-NH <sub>2</sub> /S <sub>0</sub> | bpydc-SH/S <sub>0</sub> |
|-------------------------|---------------------|--------------------------------------|------------------------|----------------------|---------------------------------------|-------------------------|
| <i>d</i> (N-N)          | -                   | -                                    | -                      | 2.676                | 2.846                                 | 2.814                   |
| <i>d</i> (C-R1)         | 1.081               | 1.361                                | 1.769                  | 1.081                | 1.350                                 | 1.760                   |
| <i>d</i> (C-R2)         | 1.081               | 1.369                                | 1.770                  | 1.081                | 1.356                                 | 1.761                   |
| $\gamma$ (HO -C1-C2-C3) | 3.9                 | -1.9                                 | 0.9                    | 3.9                  | -2.0                                  | 0.6                     |
| $\gamma$ (C4-C5-C6-C7)  | -1.7                | <b>-40.0</b>                         | <b>-38.8</b>           | -                    | -                                     | -                       |
| $\gamma$ (N2-C4-C7-N2)  | -                   | -                                    | -                      | <b>-1.7</b>          | <b>-44.2</b>                          | <b>-38.6</b>            |
| $\gamma$ (C8-C9-C10-OH) | 177.2               | -176.4                               | -172.3                 | -177.2               | -178.3                                | -170.6                  |
| $\gamma$ (C1-C2-C-R1)   | 2.6                 | -2.4                                 | 0.4                    | 0.0                  | -0.6                                  | 0.3                     |
| $\gamma$ (C10-C9-C-R2)  | -3.0                | 3.8                                  | 2.1                    | -0.1                 | 2.2                                   | 1.3                     |
|                         | bpdc/S <sub>1</sub> | bpdc-NH <sub>2</sub> /S <sub>1</sub> | bpdc-SH/S <sub>1</sub> | bpydc/S <sub>1</sub> | bpydc-NH <sub>2</sub> /S <sub>1</sub> | bpydc-SH/S <sub>1</sub> |
| <i>d</i> (N-N)          | -                   | -                                    | -                      | 2.408                | 2.374                                 | 2.403                   |
| <i>d</i> (C-R1)         | 1.081               | 1.351                                | 1.757                  | 1.081                | 1.350                                 | 1.761                   |
| <i>d</i> (C-R2)         | 1.081               | 1.376                                | 1.775                  | 1.081                | 1.355                                 | 1.762                   |
| $\gamma$ (HO-C1-C2-C3)  | 0.2                 | -0.3                                 | 0.5                    | -0.1                 | 0.4                                   | 0.3                     |
| $\gamma$ (C4-C5-C6-C7)  | -1.1                | -9.6                                 | -8.0                   | -                    | -                                     | -                       |
| $\gamma$ (N2-C4-C7-N2)  | -                   | -                                    | -                      | -1.7                 | 0.2                                   | 0.1                     |
| $\gamma$ (C6-C7-C8-OH)  | 179.8               | 177.3                                | 180.0                  | 179.8                | -179.4                                | 179.8                   |
| $\gamma$ (C1-C2-C3-R1)  | -0.4                | 0.1                                  | 1.2                    | 2.6                  | 0.1                                   | 0.1                     |
| $\gamma$ (R2-C9-C7-C8)  | -0.8                | 4.3                                  | 0.7                    | -3.6                 | 0.7                                   | 0.0                     |
|                         | bpdc/T <sub>1</sub> | bpdc-NH <sub>2</sub> /T <sub>1</sub> | bpdc-SH/T <sub>1</sub> | bpydc/T <sub>1</sub> | bpydc-NH <sub>2</sub> /T <sub>1</sub> | bpydc-SH/T <sub>1</sub> |
| <i>d</i> (N-N)          | -                   | -                                    | -                      | 2.367                | 2.344                                 | 2.362                   |
| <i>d</i> (C-R1)         | 1.081               | 1.348                                | 1.764                  | 1.081                | 1.352                                 | 1.762                   |
| <i>d</i> (C-R2)         | 1.080               | 1.365                                | 1.760                  | 1.080                | 1.358                                 | 1.764                   |
| $\gamma$ (HO -C1-C2-C3) | 1.0                 | -1.0                                 | -1.3                   | 0.0                  | 0.7                                   | 0.6                     |
| $\gamma$ (C4-C5-C6-C7)  | -0.2                | -4.6                                 | -4.3                   | -                    | -                                     | -                       |
| $\gamma$ (N2-C4-C7-N2)  | -                   | -                                    | -                      | 0.3                  | 0.4                                   | 0.1                     |
| $\gamma$ (C6-C7-C8-OH)  | -179.5              | -179.2                               | -174.1                 | -178.5               | -178.9                                | 177.5                   |
| $\gamma$ (C1-C2-C3-R1)  | -0.2                | 0.7                                  | 0.5                    | -0.2                 | 0.5                                   | 0.2                     |
| $\gamma$ (R2-C9-C7-C8)  | -0.4                | 3.2                                  | 9.3                    | -0.3                 | 0.8                                   | -0.7                    |

\*Experimental reported data to MIL125-NH<sub>2</sub> system obtained via powder diffraction<sup>66</sup>.

**Table S7.** Most intense singlet→singlet absorption transitions data to **bpdc**, **bpydc**, and proposed substituents (with -NH<sub>2</sub> and -SH) via TDDFT theory level.

| Systems                     | B3LYP       |       |            | CAM-B3LYP   |       |            | A                       |
|-----------------------------|-------------|-------|------------|-------------|-------|------------|-------------------------|
|                             | $\lambda_a$ | $f$   | Active MOs | $\lambda_a$ | $f$   | Active MOs |                         |
| <b>bpdc</b>                 | 288         | 1.043 | H→L        | 267         | 1.059 | H→L        | $\pi \rightarrow \pi^*$ |
|                             | 203         | 0.291 | H-1→L+1    | 180         | 1.030 | H-1→L+1    | $\pi \rightarrow \pi^*$ |
| <b>bpdc-NH<sub>2</sub></b>  | 347         | 0.128 | H→L        | 304         | 0.237 | H→L        | $\pi \rightarrow \pi^*$ |
|                             | 271         | 0.773 | H-2→L      | 297         | 0.131 | H-1→L      | $\pi \rightarrow \pi^*$ |
|                             | 220         | 0.266 | H-1→L+3    | 251         | 0.634 | H-2→L      | $\pi \rightarrow \pi^*$ |
|                             | 201         | 0.334 | H-6→L      | 209         | 0.773 | H→L+2      | $\pi \rightarrow \pi^*$ |
| <b>bpdc-SH</b>              | 347         | 0.045 | H→L        | 294         | 0.079 | H→L        | $\pi \rightarrow \pi^*$ |
|                             | 340         | 0.061 | H-1→L      | 291         | 0.117 | H-1→L      | $\pi \rightarrow \pi^*$ |
|                             | 281         | 0.431 | H-2→L      | 255         | 0.754 | H-2→L      | $\pi \rightarrow \pi^*$ |
|                             | 240         | 0.450 | H-1→L+3    | 225         | 0.773 | H→L+2      | $\pi \rightarrow \pi^*$ |
|                             | 212         | 0.108 | H-2→L+3    | 192         | 0.204 | H-2→L+3    | $\pi \rightarrow \pi^*$ |
| <b>bpydc</b>                | 385         | 0.002 | H→L        | 328         | 0.004 | H→L        | $\pi \rightarrow \pi^*$ |
|                             | 287         | 0.727 | H-1→L      | 268         | 0.920 | H-1→L      | $\pi \rightarrow \pi^*$ |
|                             | 258         | 0.200 | H-1→L+1    | 239         | 0.186 | H-1→L+1    | $\pi \rightarrow \pi^*$ |
| <b>bpydc-NH<sub>2</sub></b> | 323         | 0.046 | H→L        | 281         | 0.065 | H→L        | $\pi \rightarrow \pi^*$ |
|                             | 267         | 0.401 | H-3→L      | 276         | 0.034 | H-1→L      | $\pi \rightarrow \pi^*$ |
|                             | 209         | 0.177 | H-3→L+2    | 240         | 0.867 | H-2→L      | $\pi \rightarrow \pi^*$ |
|                             | 195         | 0.238 | H→L+3      | 198         | 0.734 | H-1→L+2    | $\pi \rightarrow \pi^*$ |
| <b>bpydc-SH</b>             | 334         | 0.042 | H→L        | 288         | 0.042 | H→L        | $\pi \rightarrow \pi^*$ |
|                             | 274         | 0.691 | H-3→L      | 272         | 0.113 | H-1→L      | $\pi \rightarrow \pi^*$ |
|                             | 236         | 0.316 | H-1→L+3    | 249         | 0.767 | H-2→L      | $\pi \rightarrow \pi^*$ |
|                             | 197         | 0.233 | H-6→L+1    | 220         | 0.850 | H-1→L+2    | $\pi \rightarrow \pi^*$ |

**\*Table S8.** S<sub>1</sub> → S<sub>0</sub> emission data to the systems via TDDFT theory level

| Linkers                      | B3LYP       |                      | CAM-B3LYP   |                      | Assignment              |
|------------------------------|-------------|----------------------|-------------|----------------------|-------------------------|
|                              | $\lambda_e$ | $f$                  | $\lambda_e$ | $f$                  |                         |
| <b>bpdc</b>                  | 317         | 1.350                | 301         | 1.276                | $\pi^* \rightarrow \pi$ |
| <b>bpdc- NH<sub>2</sub></b>  | 404         | 0.115                | 348         | 0.207                | $\pi^* \rightarrow \pi$ |
| <b>bpdc-SH</b>               | 402         | 0.030                | 332         | 0.067                | $\pi^* \rightarrow \pi$ |
| <b>bpydc</b>                 | 600         | 0.1*10 <sup>-2</sup> | 480         | 0.4*10 <sup>-5</sup> | $\pi^* \rightarrow \pi$ |
| <b>bpydc- NH<sub>2</sub></b> | 621         | 0.1*10 <sup>-4</sup> | 494         | 0.2*10 <sup>-5</sup> | $\pi^* \rightarrow \pi$ |
| <b>bpydc-SH</b>              | 603         | 0.2*10 <sup>-5</sup> | 480         | 0.4*10 <sup>-6</sup> | $\pi^* \rightarrow \pi$ |

\*Where  $\lambda_e$  is the theoretical emission wavelength in nm (experimental emission wavelength is XXX nm),  $f$  is the oscillator strength,  $k_{\text{rad}}$  and  $\tau_{\text{rad}}$  are the radiative transition rate (in s<sup>-1</sup>) and lifetime (in seconds).

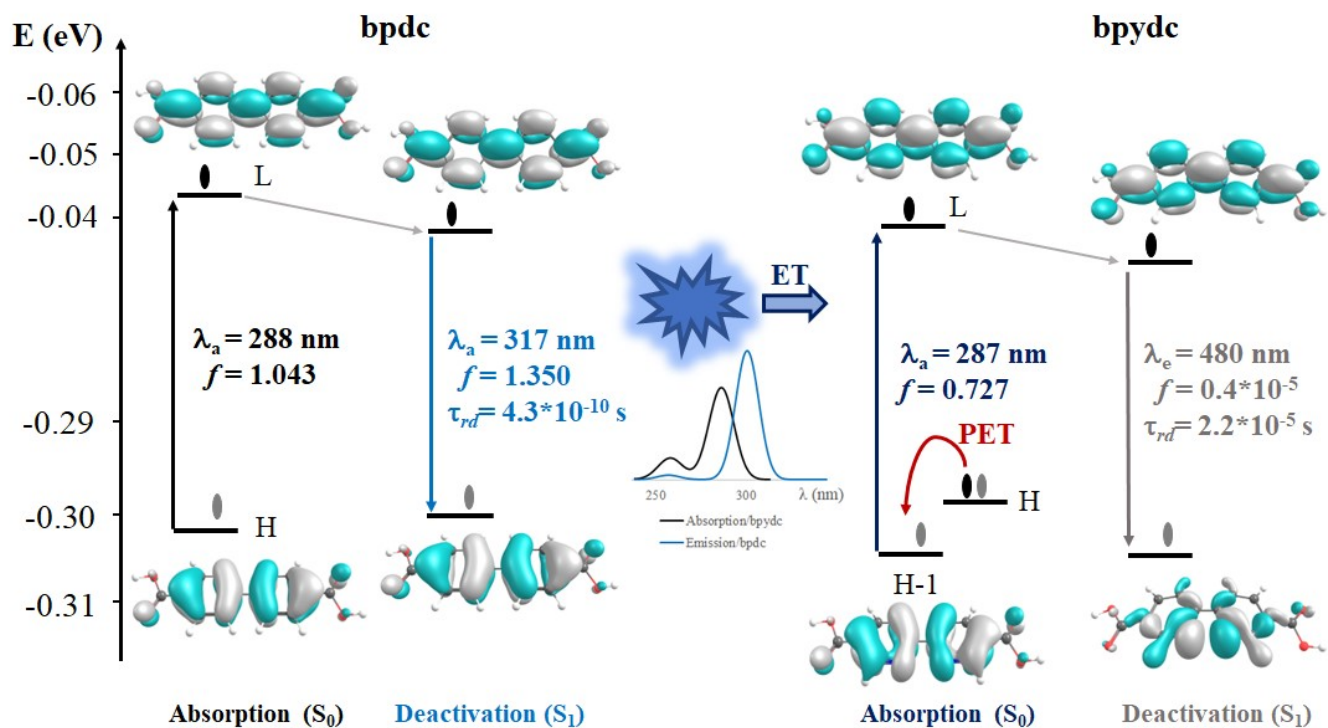

**Figure S6.** Schematic representation of the photophysical mechanism based on FMOs analysis on the S<sub>0</sub> (absorption) and S<sub>1</sub> states to free bpdC and bpydc linkers. Where,  $\lambda_a$  and  $\lambda_e$  are the computed wavelength of absorption (black and dark blue) and deactivation (light blue and gray), respectively;  $f$  is the oscillator strength;  $\tau_{rad}$  is the radiative transition lifetime and ET is energy transfer. The spectral overlap (emission bpdC/absorption at bpydc) is represented. Isosurface contour values are set as 0.03 with TDDFT/Def2-TZPP/ B3LYP theory level.

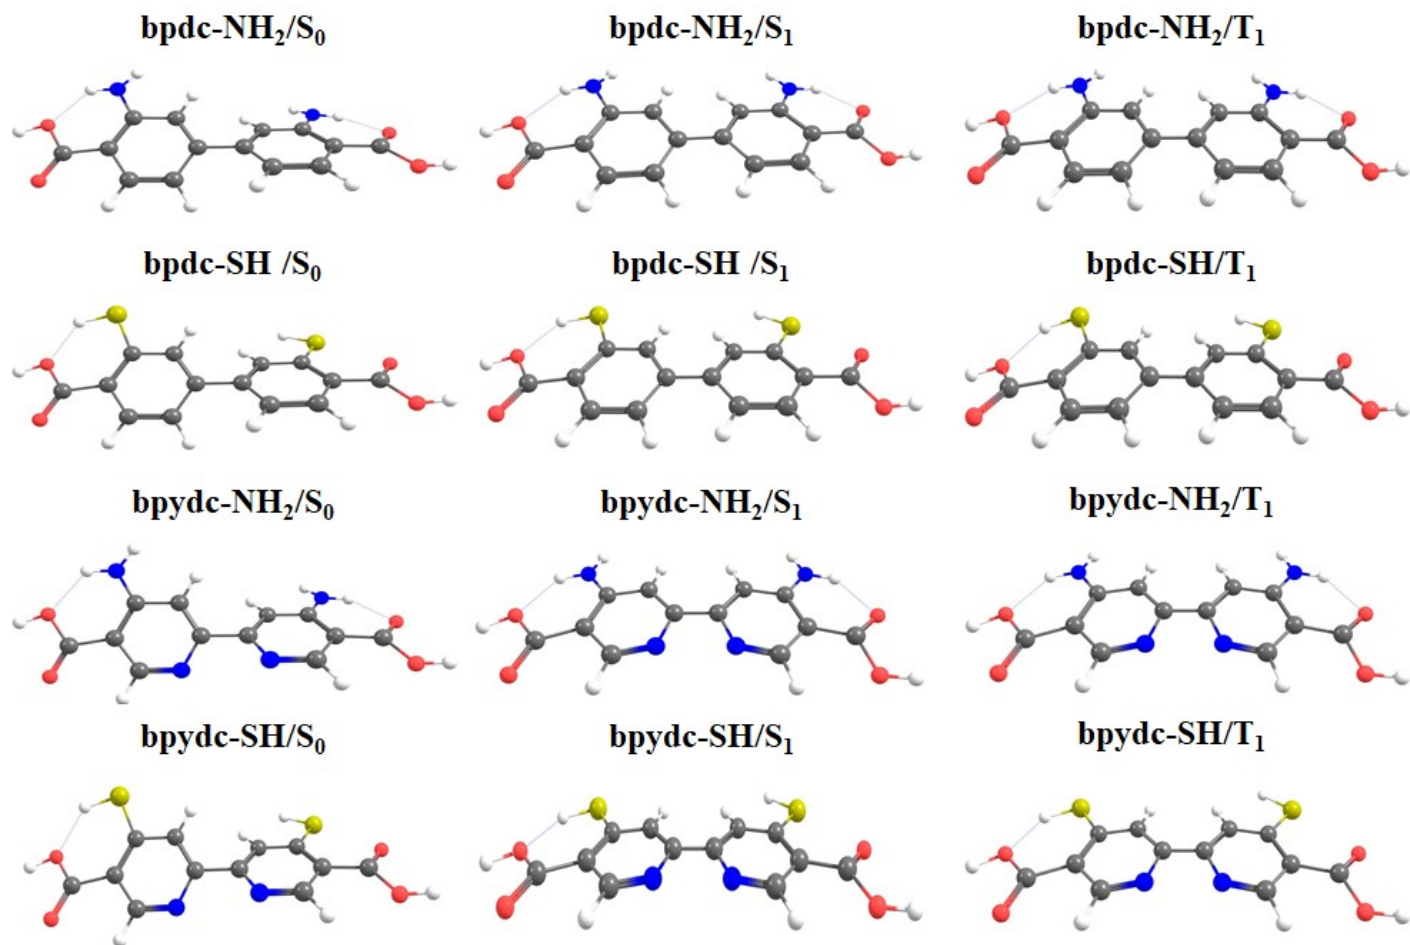

**Figure S7.** Optimized structures of the free linkers bpdc and bpydc in two perspectives to the  $S_1$  and  $T_1$  states via DFT/B3LYP/Def2-TZPP theory level. Atoms are denoted with gray (carbon), light gray (hydrogen), red (oxygen), blue (nitrogen), and yellow (sulfur) spheres.

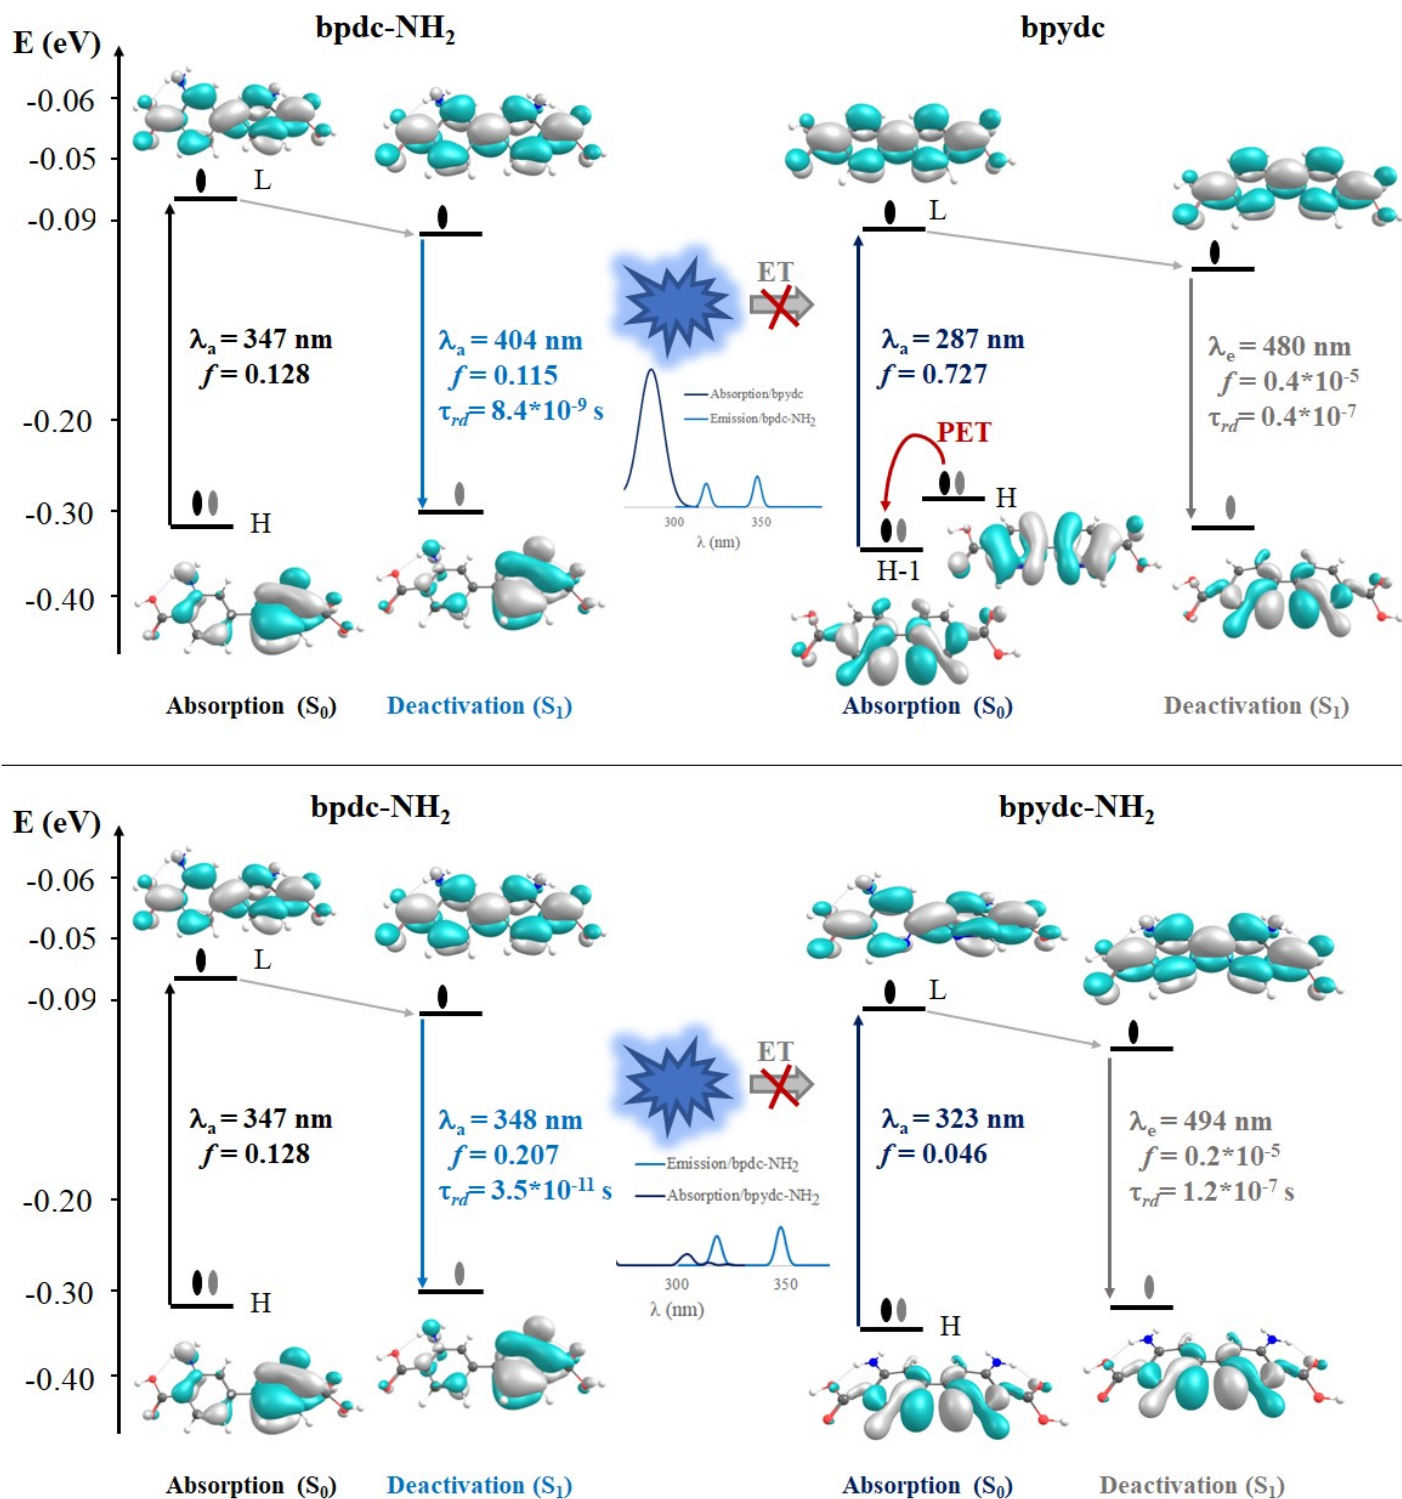

**Figure S8.** Schematic representation of the photophysical mechanism based on FMOs analysis on the S<sub>0</sub> (absorption) and S<sub>1</sub> states to **bpdC-NH<sub>2</sub>** and **bpydc-NH<sub>2</sub>** systems. Where,  $\lambda_a$  and  $\lambda_e$  are the computed wavelength of absorption (black) and deactivation (blue), respectively;  $f$  is the oscillator strength;  $\tau_{rad}$  is the radiative transition lifetime and ET is energy transfer. The spectral overlap (emission bpdC/absorption at bpydc) is represented. Isosurface contour values are set as 0.03 with TDDFT/Def2-TZPP/ B3LYP theory level.



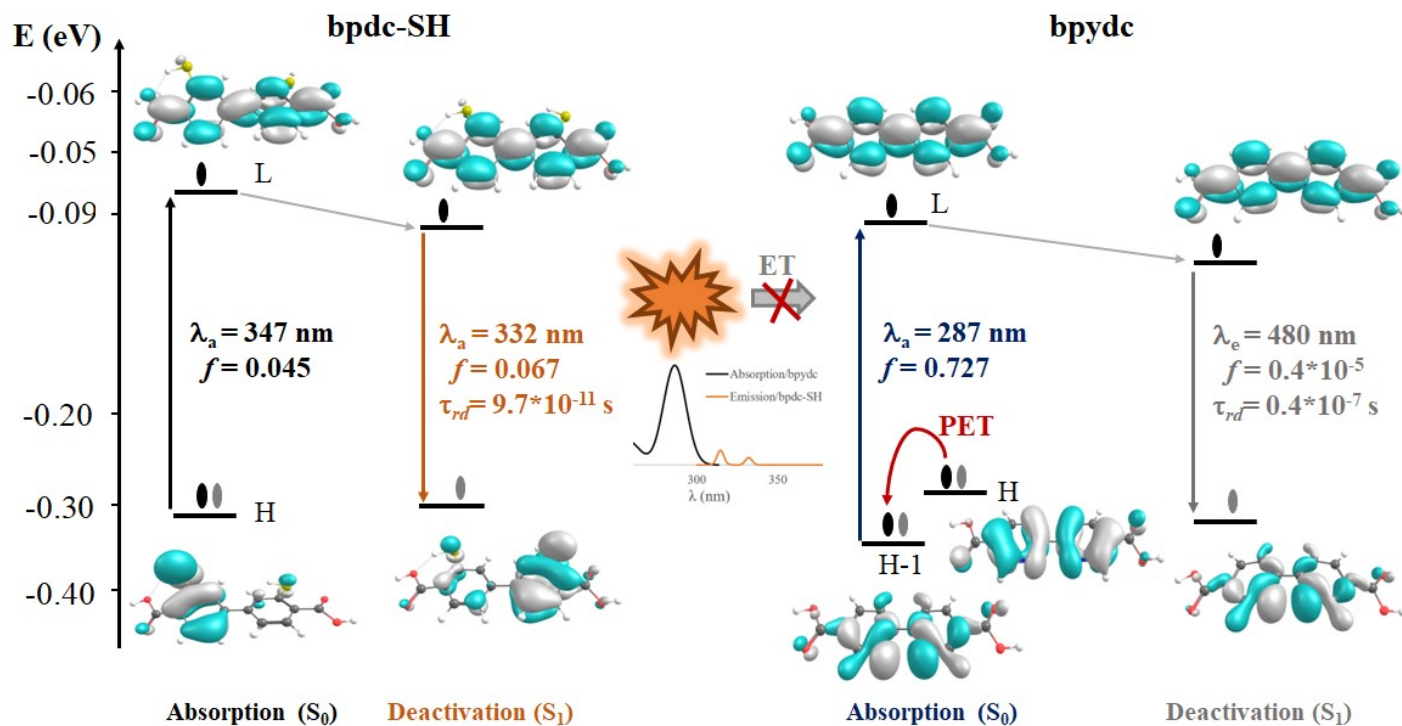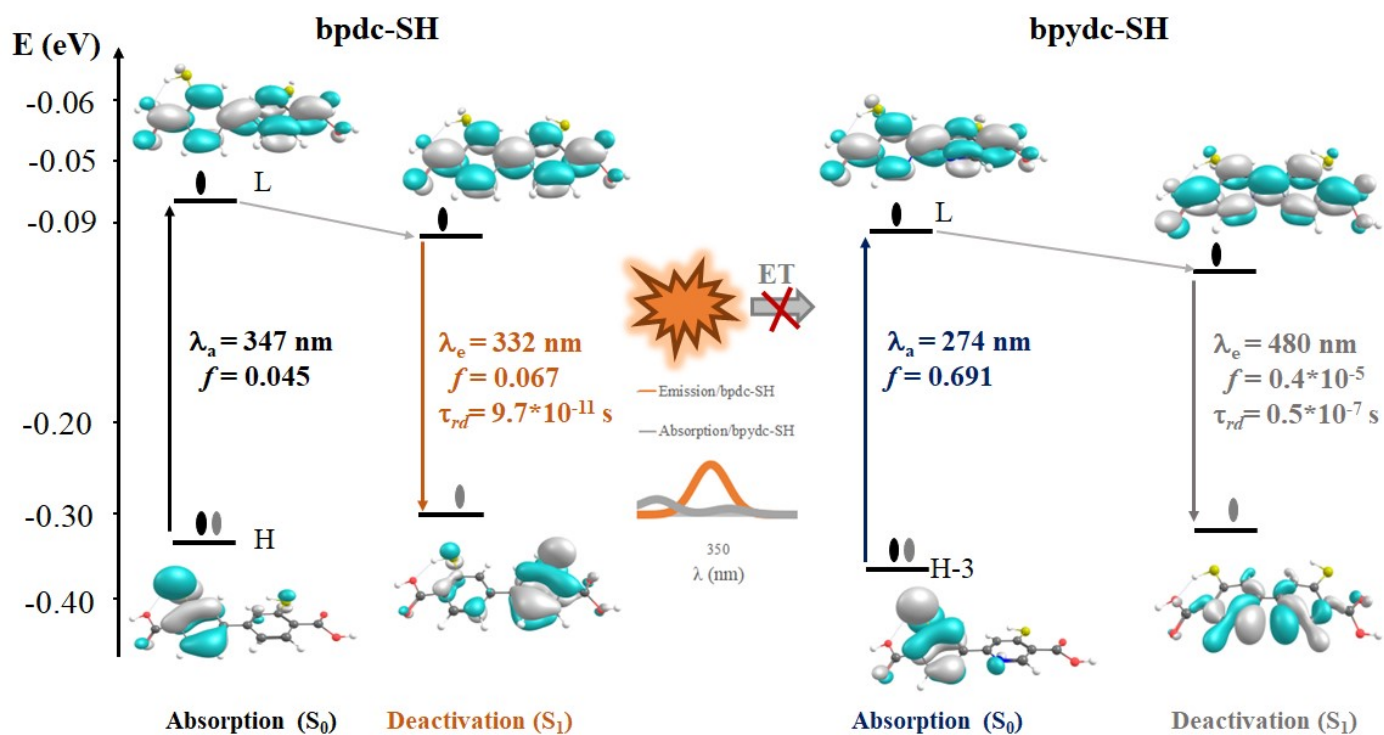

**Figure S9.** Schematic representation of the photophysical mechanism based on FMOs analysis on the  $S_0$  (absorption) and  $S_1$  states to **bpdc-SH** and **bpydc-SH** systems. Where,  $\lambda_a$  and  $\lambda_e$  are the computed wavelength of absorption (black) and deactivation (blue), respectively;  $f$  is the oscillator strength;  $\tau_{rad}$  is the radiative transition lifetime and ET is energy transfer. The spectral overlap (emission bpdc/absorption at bpydc) is represented. Isosurface contour values are set as 0.03 with TDDFT/Def2-TZPP/ B3LYP theory level.

**Table S9.** First excited singlet and triplet electronic states of the linkers taken from the **1A** and **1A-SH**. All the values are given in  $\text{cm}^{-1}$ .

| Systems      | Linker   | State          | CASSCF/NEVPT2 | Weight | Configuration                                   |
|--------------|----------|----------------|---------------|--------|-------------------------------------------------|
| <b>1A</b>    | bpdc     | S <sub>1</sub> | 31085         | 89 %   | $\pi^2 \pi^2 \pi^2 n^1 \pi^1 \pi^0 \pi^0 \pi^0$ |
|              |          | T <sub>1</sub> | 28242         | 91 %   | $\pi^2 \pi^2 \pi^2 n^1 \pi^1 \pi^0 \pi^0 \pi^0$ |
|              | bpydc    | S <sub>1</sub> | 27205         | 91%    | $\pi^2 n^2 n^1 \pi^2 \pi^1 \pi^0 \pi^0 \pi^0$   |
|              |          | T <sub>1</sub> | 26867         | 93 %   | $\pi^2 n^2 n^1 \pi^2 \pi^1 \pi^0 \pi^0 \pi^0$   |
| <b>1A-SH</b> | bpdc-SH  | S <sub>1</sub> | 17721         | 86 %   | $n^1 \pi^2 \pi^2 \pi^2 \pi^1 \pi^0 \pi^0 \pi^0$ |
|              |          | T <sub>1</sub> | 17102         | 87 %   | $n^1 \pi^2 \pi^2 \pi^2 \pi^1 \pi^0 \pi^0 \pi^0$ |
|              | bpydc-SH | S <sub>1</sub> | 24392         | 91 %   | $n^2 \pi^2 \pi^1 \pi^2 \pi^1 \pi^0 \pi^0 \pi^0$ |
|              |          | T <sub>1</sub> | 24076         | 91 %   | $n^2 \pi^2 \pi^1 \pi^2 \pi^1 \pi^0 \pi^0 \pi^0$ |

**Table S10.** Morokuma-Ziegler EDA for the systems **1A**, **1A-(NH<sub>2</sub>)** and **1A-(SH)**, in the S<sub>0</sub>. The contribution of the NOCV to the total orbital interaction (*k*) is shown. All values are in kcal mol<sup>-1</sup>.

| Systems                   | 1A           |              | 1A-(NH <sub>2</sub> )     |                            | 1A-(SH)      |               |
|---------------------------|--------------|--------------|---------------------------|----------------------------|--------------|---------------|
|                           | Node-bpdc    | Node-bpydc   | Node-bpdc-NH <sub>2</sub> | Node-bpydc-NH <sub>2</sub> | Node-bpdc-SH | Node-bpydc-SH |
| $\Delta E_{\text{Int}}$   | -168.9       | -166.37      | -170.28                   | -167.7                     | -181.75      | -188.76       |
| $\Delta E_{\text{Pauli}}$ | 110.0        | 121.3        | 112.28                    | 135.4                      | 116.09       | 167.07        |
| $\Delta E_{\text{Elect}}$ | -192.8 (69%) | -196.4 (68%) | -197.0 (67%)              | -201.6 (67%)               | -180.9 (68%) | -228.0 (65%)  |
| $\Delta E_{\text{Orb}}$   | -78.0 (31%)  | -83.32 (32%) | -96.6 (33%)               | -101.5 (33%)               | -75.6 (32%)  | -111.7 (35%)  |
| <i>k</i>                  | -20.20       | -23.10       | -20.53                    | -23.79                     | -15.30       | -23.4         |

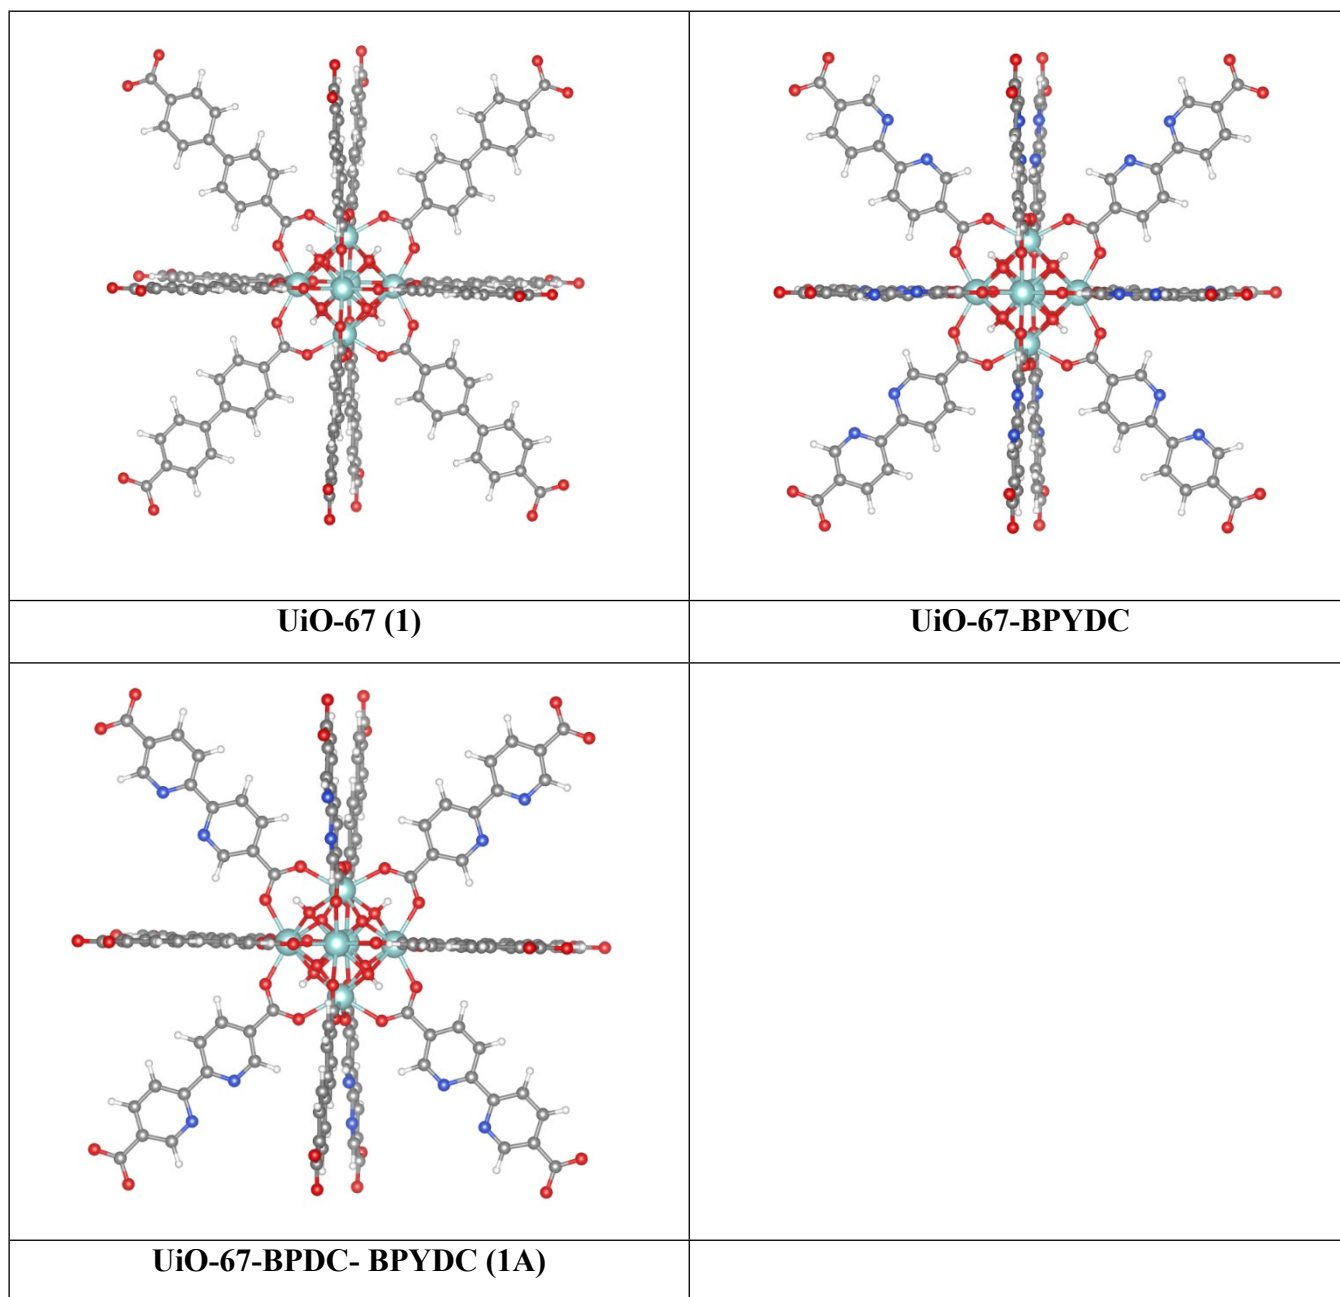

**Figure S10.** Optimized structures of UiO-67 via gradient generalized Perdew-Burke-Ernzerhof (PBE) functional, sampling the first Brillouin zone with a 3x3x3 Monkhorst-Pack k-point scheme. Moreover, a 5x5x5 k-point grid scheme was employed for final single energy calculations (including the density of state and bands calculations) with a hybrid HSE06 functional.

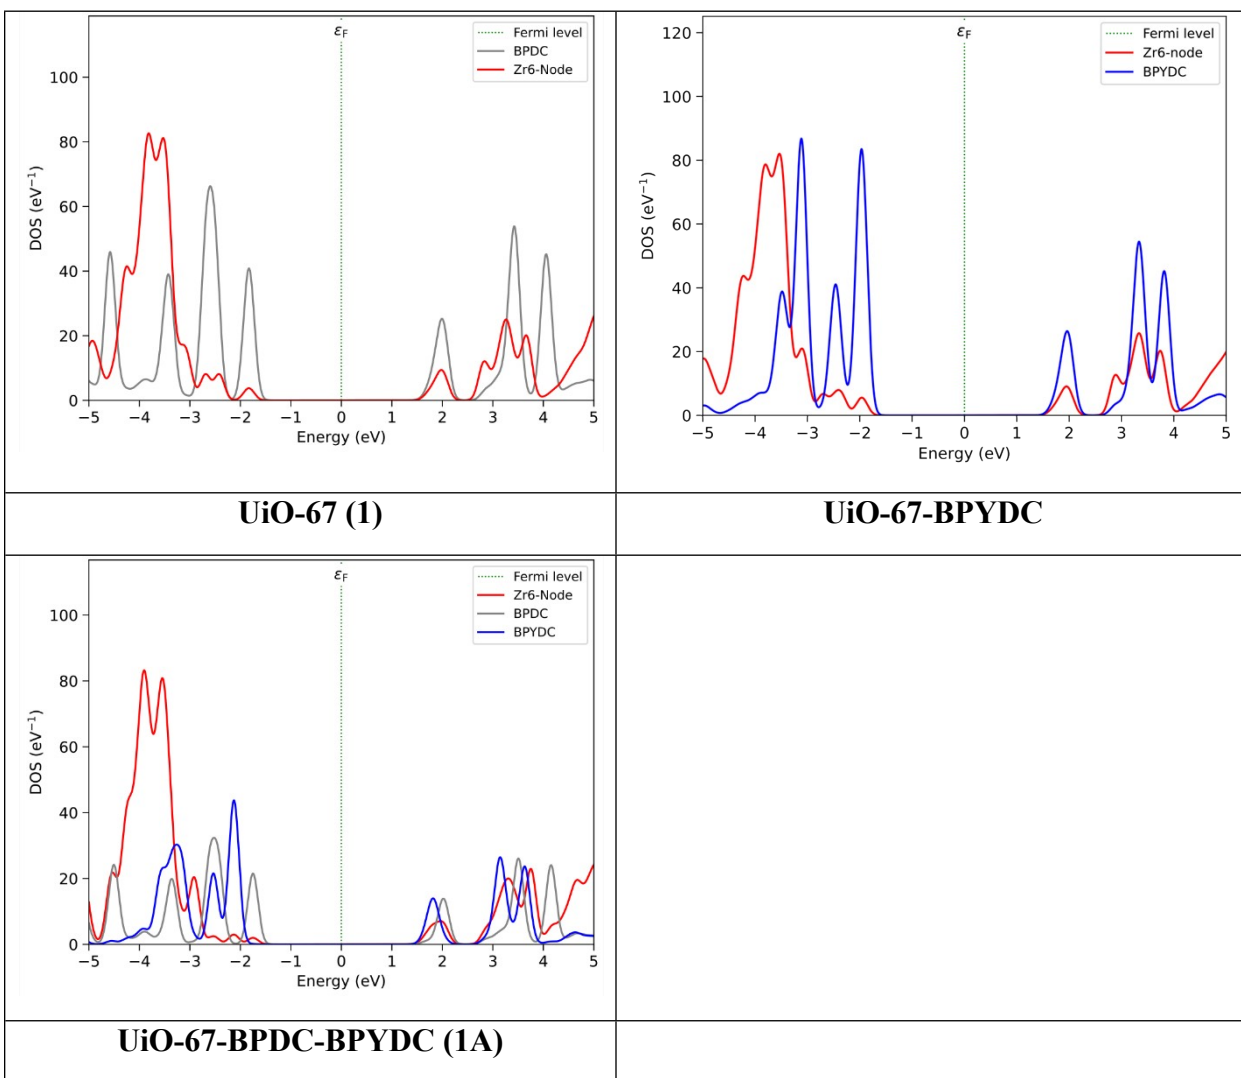

**Figure S11:** Projected Density of States (PDOS), categorized as Zr6-Node and BPDC, BPYDC. (Zr6-Node definition includes COO-)

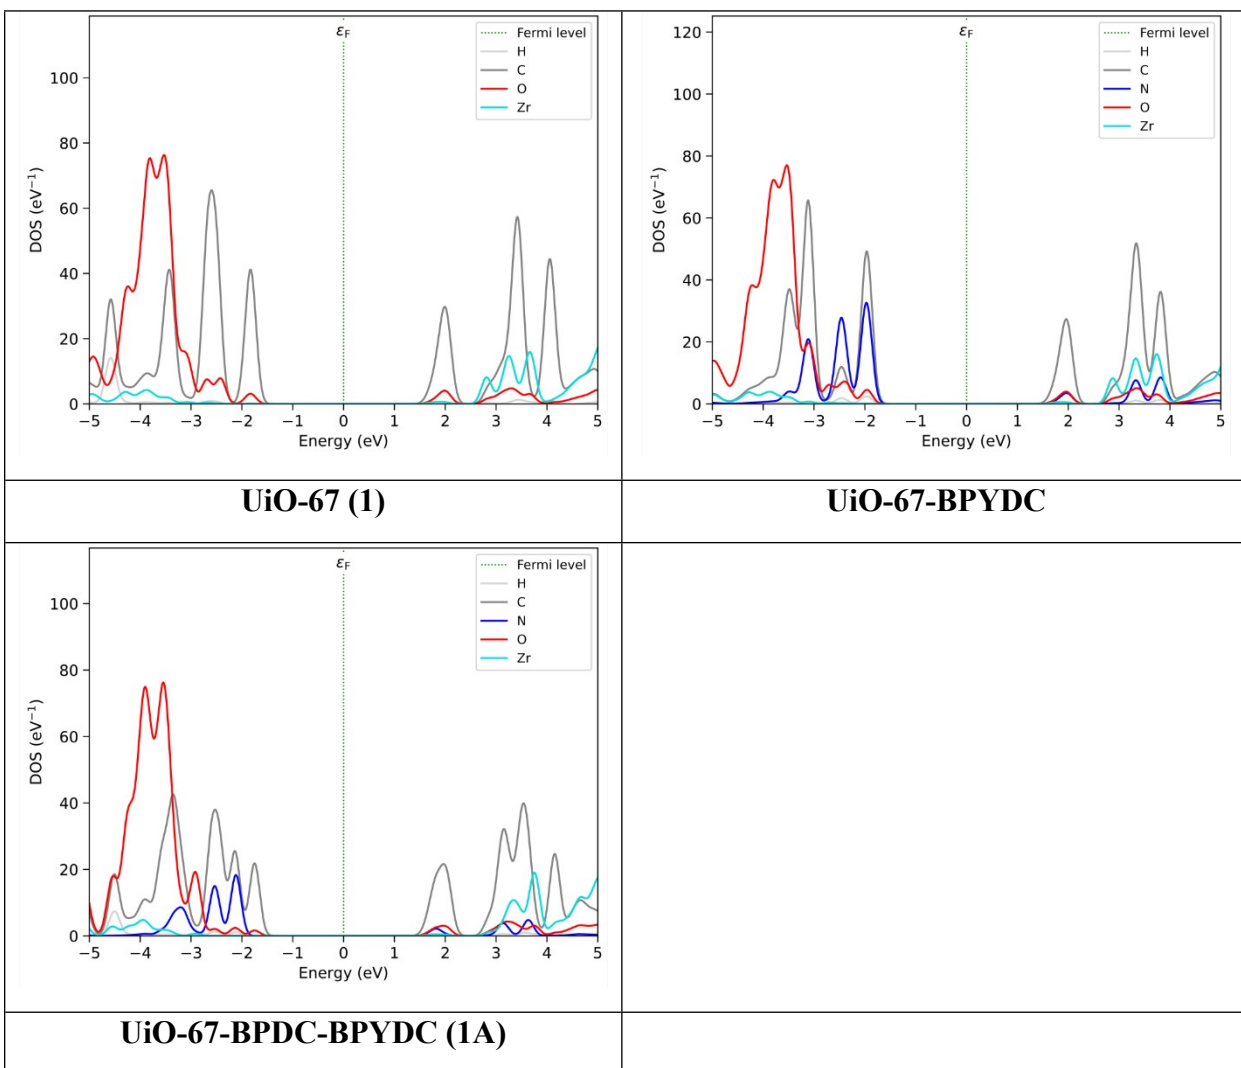

**Figure S12:** Projected Density of States (PDOS), categorized as elements.

**Table S11.** Band Gap (experimental data: UiO-67\*: 3.68 eV; UiO-67-BPYDC\*\*: 3.36 eV) and Chemical Potential

| Structure              | Band Gap (eV) | CB (eV) | VB (eV) |
|------------------------|---------------|---------|---------|
| UiO-67 (1)             | 3.418         | 1.705   | -1.713  |
| UiO-67-BPYDC           | 3.540         | 1.626   | -1.913  |
| UiO-67-BPDC-BPYDC (1A) | 3.310         | 1.584   | -1.726  |

\*S. Chavan, J. G. Vitillo, D. Gianolio, O. Zavorotynska, B. Civalieri, S. Jakobsen, M. H. Nilsen, L. Valenzano, C. Lamberti, K. P. Lillerud and S. Bordiga, *Phys. Chem Chem. Phys.*, 2012, 14, 1614

\*\*Deming, D. A.; Hurlock, M. J.; Li, X.; Kriegsman, K. W.; Ding, G.; Guo, X.; Zhang, Q. A Facile Method to Introduce Iron Secondary Metal Centers into Metal–Organic Frameworks. *J. Organomet. Chem.* **2019**, 897, 114–119. <https://doi.org/10.1016/j.jorganchem.2019.06.037>.

**Table S12.** Description of the optimized structures.

| Name                                                                   | PRIMITIVE<br>CELL_a<br>PBE (Å) | CONVENTIONAL<br>CELL_a<br>(Å) | CELL_angle_<br>PBE (°) | COD<br>ID_based |
|------------------------------------------------------------------------|--------------------------------|-------------------------------|------------------------|-----------------|
| UiO-67 with BPDC (1)                                                   | 19.23                          | 27.19                         | 59.94                  | 4512073         |
| UiO-67-BPYDC<br>UiO-67 with bipyridines. (BPYDC)                       | 19.03                          | 26.91                         | 60.00                  | 7112002         |
| UiO-67-BPDC-BPYDC (1A)<br>UiO-67 alternating BPDC and BPYDC<br>linkers | 19.08                          | 26.98                         | 60.12                  | 7112002         |

\*Data values from the experimental crystal structure of UiO-67-bpdc: a=b=c=19.01Å (26.88 Å)

\*\*Data values from the experimental crystal structure of UiO-67-bpydc: a=b=c=18.77Å (26.54 Å)
